# Supplementary material
Source: PubMed Central journal article supplement (PMC4018868)
Supplement: AEM.00065-14_zam011145384so1.pdf [file AEM.00065-14_zam011145384so1.pdf]

1

## Supplementary tables

2

### Table of Contents

|    |                                                                                                                  |    |
|----|------------------------------------------------------------------------------------------------------------------|----|
| 3  | Table S0: Statistics of Illumina HiSeq2000 sequencing output data for <i>B. licheniformis</i> strains            |    |
| 4  | G-1, F1-1 and F2-1 .....                                                                                         | 3  |
| 5  | Table S1: Comparison of genes among strains G-1, F1-1 and F2-1 as determined by RAST,                            |    |
| 6  | TBLASTN and raw read mapping.....                                                                                | 4  |
| 7  | Table S2A: The ‘Mobility and chemotaxis’ genes in <i>B. subtilis</i> 168 and the regions of their                |    |
| 8  | homologs in <i>B. licheniformis</i> strains G-1, F1-1, and F2-1.....                                             | 11 |
| 9  | Table S2B: The ‘Mobility and chemotaxis’ genes in <i>B. licheniformis</i> ATCC 14580 and the                     |    |
| 10 | regions of their homologs in <i>B. licheniformis</i> strains G-1, F1-1, and F2-1 <sup>1</sup> .....              | 18 |
| 11 | Table S3A: The genes involved in the protein secretion in <i>B. subtilis</i> 168 and the regions of              |    |
| 12 | their homologs in <i>B. licheniformis</i> strains G-1, F1-1, and F2-1 .....                                      | 20 |
| 13 | Table S3B: The genes involved in the protein secretion in <i>B. licheniformis</i> ATCC 14580 and                 |    |
| 14 | the regions of their homologs in <i>B. licheniformis</i> strains G-1, F1-1, and F2-1 <sup>1</sup> .....          | 23 |
| 15 | Table S4: The genes involved in the metabolism of phosphate in <i>B. subtilis</i> 168 and the                    |    |
| 16 | regions of their homologs in <i>B. licheniformis</i> strains G-1, F1-1, and F2-1 .....                           | 25 |
| 17 | Table S5: The genes involved in the metabolism of sulphur in <i>B. subtilis</i> 168 and the regions              |    |
| 18 | of their homologs in <i>B. licheniformis</i> strains G-1, F1-1, and F2-1 .....                                   | 27 |
| 19 | Table S6A: The genes involved in transformation/ competence in <i>B. subtilis</i> 168 and the                    |    |
| 20 | regions of their homologs in <i>B. licheniformis</i> strains G-1, F1-1, and F2-1 .....                           | 29 |
| 21 | Table S6B: The genes involved in transformation/ competence in <i>B. licheniformis</i> ATCC                      |    |
| 22 | 14580 and the regions of their homologs in <i>B. licheniformis</i> strains G-1, F1-1, and F2-1 <sup>1</sup> .... | 32 |
| 23 | Table S7A: The genes involved in the sporulation in <i>B. subtilis</i> 168 and the regions of their              |    |
| 24 | homologs in <i>B. licheniformis</i> strains G-1, F1-1, and F2-1.....                                             | 33 |
| 25 | Table S7B: The genes involved in the sporulation in <i>B. licheniformis</i> ATCC 14580 and the                   |    |
| 26 | regions of their homologs in <i>B. licheniformis</i> strains G-1, F1-1, and F2-1 <sup>1</sup> .....              | 49 |
| 27 | Table S8A: The genes involved in germination in <i>B. subtilis</i> 168 and the regions of their                  |    |
| 28 | homologs in <i>B. licheniformis</i> strains G-1, F1-1, and F2-1.....                                             | 55 |
| 29 | Table S8B: The genes in <i>B. licheniformis</i> ATCC 14580 and the regions of their homologs in                  |    |
| 30 | <i>B. licheniformis</i> strains G-1, F1-1, and F2-1 <sup>1</sup> .....                                           | 60 |
| 31 | Table S9: Homology search results for biofilm related genes in <i>Bacillus licheniformis</i> strains             |    |
| 32 | G-1, F2-1, and F1-1 <sup>1</sup> .....                                                                           | 61 |
| 33 | Table S10A: The genes involved in adaptation to atypical conditions in <i>B. subtilis</i> 168 and                |    |
| 34 | the regions of their homologs in <i>B. licheniformis</i> strains G-1, F1-1, and F2-1 .....                       | 64 |

|    |                                                                                                             |    |
|----|-------------------------------------------------------------------------------------------------------------|----|
| 35 | Table S10B: The genes involved in adaptation to atypical conditions in <i>B. licheniformis</i>              |    |
| 36 | ATCC 14580 and the regions of their homologs in <i>B. licheniformis</i> strains G-1, F1-1, and F2-          |    |
| 37 | 11.....                                                                                                     | 73 |
| 38 | Table S11A. The genes involved in antibiotic production in <i>B. subtilis</i> 168 and the regions of        |    |
| 39 | their homologs in <i>B. licheniformis</i> strains G-1, F2-1, and F1-1 .....                                 | 75 |
| 40 | Table S11B. The genes involved in antibiotic production in <i>B. licheniformis</i> ATCC 14580               |    |
| 41 | and the regions of their homologs in <i>B. licheniformis</i> strains G-1, F2-1, and F1-1 <sup>1</sup> ..... | 79 |
| 42 | Table S12A: The genes involved in detoxification in <i>B. subtilis</i> 168 and the regions of their         |    |
| 43 | homologs in <i>B. licheniformis</i> strains G-1, F1-1, and F2-1.....                                        | 81 |
| 44 | Table S12B: The genes involved in detoxification in <i>B. licheniformis</i> ATCC 14580 and the              |    |
| 45 | regions of their homologs in <i>B. licheniformis</i> strains G-1, F1-1, and F2-1 <sup>1</sup> .....         | 92 |
| 46 | Table S13: Selected genes involved in metabolism of carbohydrate and related molecules in                   |    |
| 47 | <i>B. subtilis</i> 168 and the regions of their homologs in <i>B. licheniformis</i> strains G-1, F1-1, and  |    |
| 48 | F2-1 .....                                                                                                  | 94 |
| 49 | Table S14: Contigs, coordinates, and completeness of phage or related regions in strains G-1,               |    |
| 50 | F2-1, and F1-1 <sup>1</sup> .....                                                                           | 98 |
| 51 |                                                                                                             |    |
| 52 |                                                                                                             |    |

53 **Table S0: Statistics of Illumina HiSeq2000 sequencing output data for *B. licheniformis***  
54 **strains G-1, F1-1 and F2-1**

| Statistic                       | Strain G-1 | Strain F1-1 | Strain F2-1 |
|---------------------------------|------------|-------------|-------------|
| Number of produced paired reads | 78,947,464 | 65,238,978  | 91,092,216  |
| Read length (bp)                | 101        | 101         | 101         |
| Q20 (%)                         | 94.82      | 93.74       | 94.73       |
| Q30 (%)                         | 87.92      | 85.99       | 87.85       |
| N%                              | 0.01       | 0.01        | 0.01        |

55

56

57

58

59

60

61

62

63

64

65

66

67 **Table S1: Comparison of genes among strains G-1, F1-1 and F2-1 as determined by RAST, TBLASTN and raw read mapping.**

68

| Gene/ Function                                | Strain G-1                      |                       | Strain F1-1        |                       | Strain F2-1        |                       | Presence/absence in                |                        | Highest scoring NCBI database sequence and organism using blastp |
|-----------------------------------------------|---------------------------------|-----------------------|--------------------|-----------------------|--------------------|-----------------------|------------------------------------|------------------------|------------------------------------------------------------------|
|                                               | Presence / Absence <sup>1</sup> | Contig (coordinates ) | Presence / absence | Contig (coordinates ) | Presence / absence | Contig (coordinates ) | <i>B. licheniformis</i> ATCC 14580 | <i>B. subtilis</i> 168 |                                                                  |
| Eukaryotic-type low-affinity urea transporter | Y                               | 31 (407355-408293)    | N                  | -                     | N                  | -                     | N                                  | N                      | <i>Bacillus</i> sp. 10403023 (ZP_10915670.1)                     |
| 4-amino, 4-deoxyprephenate dehydrogenase      | Y                               | 8 (97182-98096)       | N                  | -                     | N                  | -                     | N                                  | N                      | <i>Saccharopolyspora spinosa</i> NRRL 18395 (ZP_08878928.1)      |
| Para-aminobenzoate                            | Y                               | 8 (95089-             | N                  | -                     | N                  | -                     | N                                  | N                      | <i>S. spinosa</i> NRRL 18395                                     |

|                                                         |   |                        |   |                         |   |   |   |   |                                                                                                    |
|---------------------------------------------------------|---|------------------------|---|-------------------------|---|---|---|---|----------------------------------------------------------------------------------------------------|
| synthase,<br>amidotransferase<br>component              |   | 97182)                 |   |                         |   |   |   |   | (ZP_08878927.1)                                                                                    |
| Fructose-1,6-<br>biphosphatase, <i>Bacillus</i><br>type | Y | 15 (70491-<br>72413)   | N | -                       | N | - | N | Y | <i>Bacillus<br/>atrophaeus</i> C89<br>(ZP_14344679.1)                                              |
| Endo-beta-1,3-1,4<br>glucanase (Licheninase)            | Y | 30 (201004-<br>201732) | N | -                       | N | - | N | Y | <i>B. atrophaeus</i><br>1942<br>(YP_003973210.1<br>)                                               |
| Low-specificity D-<br>threonine aldolase                | Y | 30 (497417-<br>498520) | Y | 1 (1100939-<br>1102042) | N | - | Y | N | <i>B. licheniformis</i><br>ATCC 14580<br>(YP_079923.1)                                             |
| 2-methyloaconitate<br>isomerase                         | Y | 30 (488023-<br>489174) | N | -                       | N | - | N | N | <i>Bacillus<br/>sonorensis</i> L12<br>(ZP_22899089.1)                                              |
| Poly(glycerol-phosphate)<br>alpha-glucosyltransferase   | Y | 15 (579317-<br>581356) | N | -                       | N | - | N | Y | <i>Bacillus<br/>amyloliquefaciens</i><br>subsp. <i>plantarum</i><br>AS43.3<br>(YP_007188047.1<br>) |
| Thymidylate synthase<br>(ThyX)                          | Y | 30 (31580-<br>32392)   | N | -                       | N | - | N | N | <i>B. sonorensis</i> L12<br>(ZP_22898135.1)                                                        |

|                                                          |          |   |                        |   |   |   |                        |   |   |                                                                                    |
|----------------------------------------------------------|----------|---|------------------------|---|---|---|------------------------|---|---|------------------------------------------------------------------------------------|
| ATP-dependent<br>ligase                                  | DNA      | Y | 14 (11244-<br>12038)   | N | - | Y | 23 (2068 to<br>2862)   | N | Y | <i>Bacillus subtilis</i><br>subsp. <i>subtilis</i> str.<br>SC-8<br>(ZP_12671269.1) |
| ATP-dependent<br>ligase                                  | DNA      | Y | 8 (45668-<br>46057)    | N | - | N | -                      | Y | Y | <i>B. licheniformis</i><br>ATCC 14580<br>(YP_078721.1)                             |
| ATP-dependent<br>ligase                                  | DNA      | Y | 32 (502933-<br>503742) | N | - | Y | Raw reads <sup>2</sup> | Y | Y | <i>B. licheniformis</i><br>ATCC 14580<br>( YP_078721.1)                            |
| DNA-cytosine<br>methyltransferase                        |          | Y | 25 (244-<br>1809)      | N | - | N | -                      | N | N | <i>Bacillus cereus</i><br>AH1134<br>(ZP_03233286.1)                                |
| DNA-cytosine<br>methyltransferase                        |          | Y | 30 (34721-<br>36070)   | N | - | N | -                      | N | N | <i>Bacillus</i><br><i>amyloliquefaciens</i><br>DSM 7<br>(YP_003919517.1<br>)       |
| Crossover<br>endodeoxyribonuclease<br>RuvC               | junction | Y | 30 (23809-<br>24333)   | N | - | N | -                      | N | N | <i>Brevibacillus</i><br><i>borstelensis</i> AK1<br>(EMT54751.1)                    |
| Type I restriction-<br>modification system,<br>subunit M |          | Y | 32 (467190-<br>468656) | N | - | N | -                      | Y | N | <i>Enterococcus</i><br><i>faecium</i> E980<br>(ZP_06681840.1)                      |
| Type I restriction-                                      |          | Y | 32 (468697-            | N | - | N | -                      | Y | N | <i>E. faecium</i> E980<br>(ZP_06681839.1)                                          |

|                                                              |   |                        |   |           |   |           |   |   |                                                                       |
|--------------------------------------------------------------|---|------------------------|---|-----------|---|-----------|---|---|-----------------------------------------------------------------------|
| modification system,<br>subunit R                            |   | 471072)                |   |           |   |           |   |   |                                                                       |
| Type I restriction-<br>modification system,<br>subunit S     | Y | 32 (465752-<br>467185) | N | -         | N | -         | Y | N | <i>Capnocytophaga<br/>ochracea</i> str. Holt<br>25<br>(ZP_14667284.1) |
| Putative peptidoglycan<br>hydrolase (YvbX)                   | Y | 12 (154529-<br>155560) | N | -         | N | -         | N | Y | <i>B. atrophaeus</i><br>1942<br>(YP_003974852.1<br>)                  |
| Spore germination<br>protein (GerHB/GerIB)                   | Y | 32 (203381-<br>204496) | N | -         | N | -         | N | N | <i>B. licheniformis</i><br>WX-02<br>(ZP_17656399.1)                   |
| Nickel transporter<br>(UreH)                                 | Y | 31 (413565-<br>414254) | N | -         | N | -         | N | N | <i>Bacillus</i> sp.<br>10403023<br>(ZP_10915662.1)                    |
| Biphenyl-2,3-diol 1,2-<br>dioxygenase III-related<br>protein | Y | 15 (638813-<br>639202) | Y | Raw reads | Y | Raw reads | Y | N | <i>Rhizobium etli</i><br>IE4771<br>(ZP_03515769.1)                    |
| Deoxyuridine 5'-<br>triphosphate<br>nucleotidohydrolase      | Y | 30 (30553-<br>31095)   | N | -         | N | -         | N | N | <i>B. sonorensis</i> L12<br>(ZP_22898133.1)                           |

|                                       |   |                    |   |                        |   |   |   |   |                                                  |
|---------------------------------------|---|--------------------|---|------------------------|---|---|---|---|--------------------------------------------------|
| Potassium-transporting ATPase A chain | Y | 30 (418208-419878) | N | -                      | N | - | N | N | <i>B. sonorensis</i> L12 (ZP_22899191.1)         |
| Potassium-transporting ATPase B chain | Y | 30 (419895-421964) | N | -                      | N | - | N | N | <i>B. sonorensis</i> L12 (ZP_22899190.1)         |
| Potassium-transporting ATPase C chain | Y | 30 (421980-422537) | N | -                      | N | - | N | N | <i>B. sonorensis</i> L12 (ZP_22899189.1)         |
| Alanyl-tRNA synthetase family protein | Y | 30 (498547-499785) | Y | 1 (1099683 to 1100912) | N | - | Y | N | <i>B. licheniformis</i> ATCC 14580 (YP_079922.1) |
| Urease accessory protein UreD         | Y | 31 (412669-413490) | N | -                      | N | - | N | N | <i>Bacillus</i> sp. 10403023 (ZP_10915663.1)     |
| Urease accessory protein UreE         | Y | 31 (410904-411356) | N | -                      | N | - | N | N | <i>Bacillus</i> sp. 10403023 (ZP_10915666.1)     |
| Urease accessory protein UreF         | Y | 31 (411352-412032) | N | -                      | N | - | N | N | <i>Bacillus</i> sp. 10403023 (ZP_10915665.1)     |
| Urease accessory protein UreG         | Y | 31 (412107-412664) | N | -                      | N | - | N | N | <i>Bacillus</i> sp. 10403023 (ZP_10915664.1)     |
| Urease subunit alpha                  | Y | 31 (409181-        | N | -                      | N | - | N | Y | <i>Bacillus</i> sp. 10403023 (ZP_10915667.1)     |



|                                                                   |   |                    |   |                    |   |                   |   |   |                                                      |
|-------------------------------------------------------------------|---|--------------------|---|--------------------|---|-------------------|---|---|------------------------------------------------------|
|                                                                   |   | 410890)            |   |                    |   |                   |   |   |                                                      |
| Urease subunit beta                                               | Y | 31 (408858-409181) | N | -                  | N | -                 | N | N | <i>Bacillus</i> sp. 10403023 (ZP_10915668.1)         |
| Urease subunit gamma                                              | Y | 31 (408567-408833) | N | -                  | N | -                 | N | N | <i>Paenibacillus alvei</i> DSM 29 (ZP_10862792.1)    |
| Xylose ABC transporter, periplasmic xylose-binding protein (XylF) | N | -                  | Y | 4 (152214-153275)  | Y | 2 (152189-153250) | Y | N | <i>Bacillus</i> sp. BT1B_CT2 (ZP_08003205.1)         |
| Cell-division initiation protein                                  | Y | Raw reads          | Y | 14 (34320-34694)   | Y | 4 (21007-21381)   | Y | Y | <i>B. licheniformis</i> ATCC 14580 (YP_077348.1)     |
| Recombinational DNA repair protein RecT (prophage associated)     | Y | Raw reads          | Y | Raw reads          | Y | 1 (137935-138666) | Y | Y | <i>Bacillus vallismortis</i> DV1-F-3 (ZP_10509695.1) |
| Competence protein F homolog, phosphoribosyltransferase domain    | Y | Raw reads          | Y | 25 (178363-179094) | Y | 24 (33244-34152)  | Y | Y | <i>B. licheniformis</i> ATCC 14580 (YP_080871.1)     |

69 <sup>1</sup>Y=Presence of gene, N=Absence of gene or only a few reads (1-6) were aligned with the coverage depth of 1 when raw reads corresponding to the gene were  
70 mapped to the contigs of another strain having this gene in order to see its presence or absence.<sup>1</sup>Raw reads with significant coverage were seen in the strain  
71 when the former were mapped to the contigs of another strain.

72

73 **Table S2A: The ‘Mobility and chemotaxis’ genes in *B. subtilis* 168 and the regions of**  
 74 **their homologs in *B. licheniformis* strains G-1, F1-1, and F2-1**

| <i>B. subtilis</i><br>gene <sup>1</sup> | Contigs and coordinates in strains of <i>B. licheniformis</i> where the homologous sequence is found |            |                        |            |                        |            |
|-----------------------------------------|------------------------------------------------------------------------------------------------------|------------|------------------------|------------|------------------------|------------|
|                                         | G-1                                                                                                  |            | F1-1                   |            | F2-1                   |            |
|                                         | Contig and coordinates                                                                               | % identity | Contig and coordinates | % identity | Contig and coordinates | % identity |
| <i>cheC</i>                             | 31 (275479-276105)                                                                                   | 75         | 1 (181644-182270)      | 75         | 27 (181708-182334)     | 75         |
| <i>cheD</i>                             | 31 (276123-276608)                                                                                   | 77         | 1 (182288-182773)      | 77         | 27 (182352-182837)     | 77         |
| <i>cheR</i>                             | 30 (875740-876501)                                                                                   | 75         | 1 (712109-712870)      | 73         | 35 (551559-552320)     | 74         |
| <i>cheV</i>                             | 31 (37609-38520)                                                                                     | 75         | 8 (604621-605532)      | 74         | 48 (587865-588776)     | 74         |
| <i>cheW</i>                             | 31 (274992-275453)                                                                                   | 71         | 1 (181157-181609)      | 73         | 27 (181221-181673)     | 73         |
| <i>flgB</i>                             | 31 (251403-251789)                                                                                   | 71         | 1 (157592-157972)      | 71         | 27 (157584-157964)     | 69         |
| <i>flgC</i>                             | 31 (251792-252241)                                                                                   | 77         | 1 (157975-158424)      | 77         | 27 (157967-158416)     | 77         |
| <i>flgE</i>                             | 31 (260274-261071)                                                                                   | 61         | 1 (166451-167236)      | 62         | 27 (166443-167228)     | 62         |
| <i>flgK</i>                             | 15 (609980-611488)                                                                                   | 68         | 25 (180444-181952)     | 68         | 1 (135077-136585)      | 68         |

|             |                    |    |                    |    |                    |    |
|-------------|--------------------|----|--------------------|----|--------------------|----|
| <i>flgL</i> | 15 (611502-612410) | 75 | 25 (181966-182874) | 75 | 1 (134155-135063)  | 75 |
| <i>flgM</i> | NSH <sup>2</sup>   | -  | NSH                | -  | NSH                | -  |
| <i>flhA</i> | 31 (267836-269866) | 90 | 1 (174001-176031)  | 90 | 27 (174065-176095) | 90 |
| <i>flhB</i> | 31 (266723-267799) | 75 | 1 (172888-173964)  | 75 | 27 (172952-174028) | 75 |
| <i>flhF</i> | 31 (269869-270972) | 58 | 1 (176034-177137)  | 58 | 27 (176098-177201) | 58 |
| <i>flhO</i> | 15 (498498-499331) | 71 | 25 (86777-87610)   | 71 | 1 (229412-230245)  | 71 |
| <i>flhP</i> | 15 (499381-500205) | 62 | 25 (87660-88484)   | 62 | 1 (228538-229362)  | 62 |
| <i>fliD</i> | 15 (615911-617389) | 65 | 25 (185664-187121) | 66 | 1 (129908-131365)  | 66 |
| <i>fliE</i> | NSH                | -  | NSH                | -  | NSH                | -  |
| <i>fliF</i> | 31 (252626-254224) | 69 | 1 (158809-160407)  | 69 | 27 (158801-160399) | 69 |
| <i>fliG</i> | 31 (254241-255254) | 89 | 1 (160424-161437)  | 88 | 27 (160416-161429) | 88 |
| <i>fliH</i> | 31 (255379-255945) | 53 | 1 (161562-162128)  | 53 | 27 (161554-162120) | 53 |
| <i>fliI</i> | 31 (256044-257318) | 85 | 1 (162227-163501)  | 85 | 27 (162219-163493) | 85 |
| <i>fliJ</i> | 31 (257324-        | 75 | 1 (163507-         | 76 | 27 (163499-        | 76 |

|              |                        |    |                        |    |                        |    |
|--------------|------------------------|----|------------------------|----|------------------------|----|
|              | 257761)                |    | 163944)                |    | 163936)                |    |
| <i>fliK</i>  | 31 (258916-<br>259734) | 46 | 1 (164874-<br>165911)  | 41 | 27 (164866-<br>165903) | 41 |
| <i>fliL</i>  | NSH                    | -  | NSH                    | -  | NSH                    | -  |
| <i>fliM</i>  | 31 (261796-<br>262791) | 88 | 1 (167964-<br>168959)  | 88 | 27 (167956-<br>169023) | 77 |
| <i>fliP</i>  | 31 (264989-<br>265651) | 90 | 1 (171154-<br>171816)  | 90 | 27 (171218-<br>171880) | 90 |
| <i>fliQ</i>  | 31 (265671-<br>265936) | 79 | 1 (171836-<br>172101)  | 79 | 31 (171900-<br>172165) | 79 |
| <i>fliR</i>  | 31 (265950-<br>266720) | 74 | 1 (172115-<br>172885)  | 74 | 27 (172179-<br>172949) | 74 |
| <i>fliS</i>  | 15 (617411-<br>617809) | 71 | 25 (187167-<br>187565) | 71 | 1 (129464-<br>129862)  | 71 |
| <i>fliT</i>  | NSH                    | -  | NSH                    | -  | NSH                    | -  |
| <i>fliY</i>  | 31 (262793-<br>263917) | 71 | 1 (168961-<br>170082)  | 71 | 27 (169025-<br>170146) | 71 |
| <i>fliZ</i>  | 31 (264328-<br>264993) | 60 | 1 (170493-<br>171158)  | 57 | 27 (170557-<br>171222) | 57 |
| <i>hag</i>   | 15 (613835-<br>614749) | 81 | 25 (184298-<br>185116) | 74 | 1 (131913-<br>132731)  | 74 |
| <i>hemAT</i> | 32 (279077-<br>280303) | 67 | 8 (181170-<br>182396)  | 67 | 48 (157726-<br>158952) | 67 |
| <i>mcpA</i>  | 4 (38696-<br>40678)    | 65 | 15 (35843-<br>37825)   | 65 | 13 (36925-<br>38907)   | 65 |

|             |                      |    |                   |    |                    |    |
|-------------|----------------------|----|-------------------|----|--------------------|----|
|             | 4 (36580-36559)      | 64 | 15 (33728-35707)  | 64 | 13 (34810-36789)   | 64 |
|             | 4 (40825-42804)      | 61 | 15 (37974-39953)  | 61 | 13 (39397-41037)   | 59 |
|             | 30 (1086640-1088604) | 60 | 1 (507608-509587) | 60 | 27 (507649-509628) | 60 |
| <i>mcpB</i> | 31 (25113-26858)     | 31 | 8 (592243-593907) | 33 | 48 (575487-577151) | 32 |
|             | 4 (38696-40678)      | 62 | 15 (35843-37825)  | 62 | 13 (36925-38907)   | 62 |
|             | 4 (36580-38559)      | 61 | 15 (33728-35707)  | 61 | 13 (34810-36789)   | 61 |
|             | 4 (40825-42804)      | 61 | 15 (37974-39953)  | 61 | 13 (39397-41037)   | 59 |
|             | 30 (1086640-1088604) | 61 | 1 (507608-509587) | 61 | 27 (507649-509628) | 61 |
| <i>mcpC</i> | 31 (24894-26858)     | 60 | 8 (591943-593907) | 59 | 48 (575187-577151) | 59 |
|             | 4 (36583-38151)      | 31 | 15 (33731-35299)  | 31 | 13 (34813-36381)   | 31 |
|             | 4 (38699-40270)      | 30 | 15 (35846-37417)  | 31 | 13 (36928-38499)   | 30 |
|             | 4 (40825-42396)      | 32 | 15 (39545-37974)  | 32 | 13 (39310-40629)   | 35 |
|             | 30 (1086652-         | 33 | 1 (508025-        | 33 | 27 (508066-        | 33 |

|             |                      |    |                   |    |                    |    |
|-------------|----------------------|----|-------------------|----|--------------------|----|
|             | 1088187)             |    | 50581)            |    | 509622)            |    |
| <i>motA</i> | 11 (19330-20148)     | 75 | 8 (560954-561772) | 75 | 48 (500438-501256) | 75 |
| <i>motB</i> | 11 (18579-19310)     | 67 | 8 (560203-560934) | 67 | 48 (499687-500418) | 67 |
| <i>tlpA</i> | 31 (25056-26858)     | 32 | 8 (592090-593907) | 32 | 48 (575334-577151) | 32 |
|             | 4 (38696-40600)      | 60 | 15 (35843-37747)  | 60 | 13 (36925-38829)   | 60 |
|             | 4 (40825-42726)      | 59 | 15 (37974-39875)  | 59 | 13 (39397-40959)   | 57 |
|             | 4 (36580-38481)      | 59 | 15 (33728-35629)  | 58 | 13 (34810-36711)   | 58 |
|             | 30 (1086640-1088526) | 56 | 1 (507686-509587) | 57 | 27 (507727-509628) | 57 |
|             | 8 (159300-160427)    | 39 | -                 | -  | -                  | -  |
| <i>tlpB</i> | 4 (38696-40678)      | 61 | 15 (35843-37825)  | 61 | 13 (36925-38907)   | 61 |
|             | 4 (40825-42804)      | 59 | 15 (37974-39953)  | 60 | 13 (39394-41037)   | 58 |
|             | 4 (36580-38559)      | 59 | 15 (33728-35707)  | 59 | 13 (34810-36789)   | 58 |
|             | 30 (1086640-1088604) | 60 | 1 (507608-509587) | 61 | 27 (507649-509628) | 60 |

|             |                    |    |                    |    |                    |    |
|-------------|--------------------|----|--------------------|----|--------------------|----|
| <i>tlpC</i> | 1 (15596-17215)    | 25 | 4 (17515-19203)    | 54 | 2 (17491-18606)    | 53 |
| <i>yfmS</i> | 12 (115896-116678) | 84 | 30 (144375-145157) | 85 | 29 (132903-133685) | 85 |
| <i>ylqH</i> | NSH                | -  | NSH                | -  | NSH                | -  |
| <i>ylxG</i> | 31 (259854-260243) | 59 | 1 (166031-166420)  | 59 | 27 (166023-166412) | 59 |
| <i>ylxH</i> | 31 (270987-271856) | 59 | 1 (177152-178021)  | 59 | 27 (177216-178085) | 59 |
| <i>yoaH</i> | 15 (105746-107347) | 80 | 16 (32490-34091)   | 79 | 8 (24904-26505)    | 79 |
| <i>ytxD</i> | 30 (148194-149009) | 79 | 28 (111216-112031) | 79 | 49 (112884-113699) | 79 |
| <i>ytxE</i> | 30 (149002-149688) | 63 | 28 (112024-112707) | 63 | 49 (113692-114375) | 63 |
| <i>yvaQ</i> | 8 (158931-160358)  | 31 | 4 (153388-154458)  | 40 | 12 (144640-146067) | 31 |
|             | -                  | -  | -                  | -  | 2(153363-154433)   | 40 |
| <i>yvyC</i> | NSH                | -  | NSH                | -  | NSH                | -  |
| <i>yvyF</i> | 15 (608692-609105) | 66 | 25 (179156-179569) | 63 | 1 (137460-137873)  | 63 |
| <i>yvyG</i> | NSH                | -  | NSH                | -  | NSH                | -  |
| <i>yvzB</i> | 15 (614177-614749) | 63 | 25 (184640-185116) | 78 | 1 (131913-132389)  | 78 |



75 <sup>1</sup>Homology for the proteins encoded by these genes were first searched with TBLASTN  
76 using BLOSUM62 matrix in the three target strains, and if the region of significant homology  
77 was not achieved using this matrix, BLOSUM45 matrix was used. If the protein sequences  
78 did not show homology, discontinuous megablast with corresponding nucleotide sequences  
79 as queries (instead of amino acid sequenced) were used (homologous regions found in such a  
80 way are shown green). <sup>2</sup>NSH means 'no significant homology'. The contigs and coordinates  
81 for the genes for which query coverage was 95% or less are coloured brown. The percentage  
82 identity in black and brown fonts represents amino acid identity and that in green represents  
83 nucleotide identity.

84

85

86

87

88

89

90

91

92

93

94

95 **Table S2B: The ‘Mobility and chemotaxis’ genes in *B. licheniformis* ATCC 14580 and**  
 96 **the regions of their homologs in *B. licheniformis* strains G-1, F1-1, and F2-1<sup>1</sup>**

| <i>B. licheniformis</i><br>ATCC 14580<br>gene <sup>2</sup> | and coordinates in strains of <i>B. licheniformis</i> where the homologous<br>sequence is found |               |                           |               |                           |               |
|------------------------------------------------------------|-------------------------------------------------------------------------------------------------|---------------|---------------------------|---------------|---------------------------|---------------|
|                                                            | G-1                                                                                             | %<br>identity | F1-1                      | %<br>identity | F2-1                      | %<br>identity |
| <i>flgM</i>                                                | 15<br>(609191-<br>609457)                                                                       | 98            | 25<br>(179655-<br>179921) | 100           | 1 (137108-<br>137374)     | 100           |
| <i>fliE</i>                                                | 31<br>(252258-<br>252572)                                                                       | 96            | 1 (158441-<br>158755)     | 100           | 27<br>(158433-<br>158747) | 100           |
| <i>fliL</i>                                                | 31<br>(261329-<br>261757)                                                                       | 97            | 1 (167497-<br>167925)     | 100           | 27<br>(167489-<br>167917) | 100           |
| <i>fliT</i>                                                | 15<br>(617812-<br>618150)                                                                       | 93            | 25<br>(187568-<br>187906) | 100           | 1 (129123-<br>129461)     | 100           |
| <i>ylqH</i>                                                | 31<br>(240057-<br>240341)                                                                       | 97            | 1 (146239-<br>146520)     | 99            | 27<br>(146231-<br>146512) | 100           |
| <i>yvyC</i>                                                | 15 (615550<br>-615891)                                                                          | 94            | 25 (185304<br>- 185645)   | 99            | 1 (131384<br>-131725)     | 98            |
| <i>yvyG</i>                                                | 15<br>(609476-                                                                                  | 97            | 25<br>(179940-            | 99            | 1 (136616-<br>137089)     | 99            |

|  |         |  |         |  |  |  |
|--|---------|--|---------|--|--|--|
|  | 609949) |  | 180413) |  |  |  |
|--|---------|--|---------|--|--|--|

97 <sup>1</sup>If no homologous region is found for any amino acid sequence or gene by using the  
 98 sequence from *B. subtilis*, the corresponding amino acid or gene sequence was obtained from  
 99 *B. licheniformis* ATCC 14580 (NC\_006322.1) and homology search was performed similar  
 100 to that for the genes in table S2A. <sup>2</sup>These genes, when extracted from *B. subtilis* genome, had  
 101 shown no significant homology in table S2A. The colour codes are same as that used in the  
 102 above table S2A.

103

104

105

106

107

108

109

110

111

112

113

114

115

116 **Table S3A: The genes involved in the protein secretion in *B. subtilis* 168 and the regions**  
 117 **of their homologs in *B. licheniformis* strains G-1, F1-1, and F2-1**

| <i>B. subtilis</i><br>gene <sup>1</sup> | Contig and coordinates in strains of <i>B. licheniformis</i> where the homologous sequence is found |            |                        |            |                        |            |
|-----------------------------------------|-----------------------------------------------------------------------------------------------------|------------|------------------------|------------|------------------------|------------|
|                                         | G-1                                                                                                 |            | F1-1                   |            | F2-1                   |            |
|                                         | Contig and coordinates                                                                              | % identity | Contig and coordinates | % identity | Contig and coordinates | % identity |
| <i>csaA</i>                             | NSH <sup>2</sup>                                                                                    | -          | NSH                    | -          | NSH                    | -          |
| <i>ffh</i>                              | 31 (232295-233632)                                                                                  | 91         | 1 (138486-139823)      | 92         | 27 (138478-139815)     | 92         |
| <i>ftsY</i>                             | 31 (230836-231813)                                                                                  | 83         | 1 (137027-138004)      | 83         | 27 (137019-137996)     | 83         |
| <i>lspA</i>                             | 31 (177085-177534)                                                                                  | 83         | 1 (83290-83739)        | 82         | 27 (83277-83726)       | 82         |
| <i>lytA</i>                             | NSH                                                                                                 | -          | NSH                    | -          | NSH                    | -          |
| <i>prsA</i>                             | 32 (320033-320791)                                                                                  | 68         | 8 (140967-141725)      | 68         | 48 (117520-118278)     | 68         |
| <i>secA</i>                             | 15 (619493-622015)                                                                                  | 90         | 25 (189244-191766)     | 91         | 1 (125263-127785)      | 91         |
| <i>secDF</i>                            | 30 (357233-359431)                                                                                  | 84         | 1 (1218290-1220488)    | 85         | 35 (109945-112143)     | 85         |
| <i>secE</i>                             | NSH                                                                                                 | -          | NSH                    | -          | NSH                    | -          |
| <i>secG</i>                             | NSH                                                                                                 | -          | NSH                    | -          | NSH                    | -          |
| <i>secY</i>                             | 13 (42448-43740)                                                                                    | 84         | 10 (14426-15718)       | 84         | 7 (14422-15714)        | 84         |

|              |                    |    |                   |    |                    |    |
|--------------|--------------------|----|-------------------|----|--------------------|----|
| <i>sipS</i>  | 31 (72942-73493)   | 68 | 8 (640162-640713) | 68 | 48 (623406-623957) | 68 |
| <i>sipT</i>  | 31 (72975-73490)   | 79 | 8 (640195-640710) | 79 | 48 (623439-623954) | 79 |
| <i>sipU</i>  | NSH                | -  | NSH               | -  | NSH                | -  |
| <i>sipV</i>  | 32 (273598-274098) | 67 | 8 (187372-187872) | 68 | 48 (163928-164428) | 68 |
| <i>sipW</i>  | 30 (626911-627477) | 65 | 1 (985867-986433) | 63 | 35 (352645-353211) | 63 |
| <i>tatAC</i> | NSH                | -  | NSH               | -  | NSH                | -  |
| <i>tatAD</i> | NSH                | -  | NSH               | -  | NSH                | -  |
| <i>tatAY</i> | NSH                | -  | NSH               | -  | NSH                | -  |
| <i>tatCD</i> | 19 (140627-141352) | 70 | 4 (128234-128959) | 71 | 2 (128210-128935)  | 71 |
| <i>tatCY</i> | 28 (3327-4073)     | 76 | 30 (7800-8552)    | 76 | 24 (45617-46369)   | 76 |
| <i>tepA</i>  | 31 (319047-319715) | 89 | 1 (225194-225862) | 90 | 27 (225258-225926) | 90 |
| <i>yacD</i>  | 2 (8851-9735)      | 70 | 14 (45981-46865)  | 70 | 4 (8835-9719)      | 69 |
| <i>yobE</i>  | 33 (24505-25143)   | 71 | 30 (17256-17894)  | 71 | 29 (5608-6246)     | 71 |
| <i>yoqW</i>  | 33 (24505-25167)   | 73 | 30 (17232-17894)  | 73 | 29 (5584-6246)     | 73 |

|             |                      |    |                   |    |                    |    |
|-------------|----------------------|----|-------------------|----|--------------------|----|
| <i>yvmB</i> | 30 (1083040-1083516) | 65 | 1 (512736-513212) | 65 | 27 (512777-513253) | 65 |
|-------------|----------------------|----|-------------------|----|--------------------|----|

118 <sup>1</sup>Homology for the proteins encoded by these genes were first searched with TBLASTN  
119 using BLOSUM62 matrix in the three target strains, and if the region of significant homology  
120 was not achieved using this matrix, BLOSUM45 matrix was used. <sup>2</sup>NSH means ‘no  
121 significant homology’. The contigs and coordinates of genes for which query coverage was  
122 95% or less are coloured brown. The percentage represents amino acid identity.

123  
124  
125  
126  
127  
128  
129  
130  
131  
132  
133  
134  
135

136 **Table S3B: The genes involved in the protein secretion in *B. licheniformis* ATCC 14580**  
 137 **and the regions of their homologs in *B. licheniformis* strains G-1, F1-1, and F2-1<sup>1</sup>**

| <i>B. licheniformis</i><br>ATCC 14580<br>Gene <sup>2</sup> | Contig, coordinates and % identity in strains of <i>B. licheniformis</i> where the homologous sequence is found |            |                        |            |                        |            |
|------------------------------------------------------------|-----------------------------------------------------------------------------------------------------------------|------------|------------------------|------------|------------------------|------------|
|                                                            | G-1                                                                                                             |            | F1-1                   |            | F2-1                   |            |
|                                                            | Contig and coordinates                                                                                          | % identity | Contig and coordinates | % identity | Contig and coordinates | % identity |
| <i>csaA</i>                                                | 30 (1086242-1086571)                                                                                            | 95         | 1 (509642-509971)      | 100        | 27 (509683-510012)     | 100        |
| <i>lytA</i>                                                | NSH <sup>3</sup>                                                                                                | -          | 25 (155617-155937)     | 100        | 1 (161092-161412)      | 100        |
| <i>secE</i>                                                | 13 (16335-16514)                                                                                                | 99         | 10 (41684-41863)       | 100        | 7 (41680-41859)        | 100        |
| <i>secG</i>                                                | 15 (744214-744444)                                                                                              | 98         | 25 (312561-312791)     | 100        | 1 (4315-4545)          | 100        |
| <i>sipU</i>                                                | 31 (72936-73493)                                                                                                | 98         | 8 (640156-640713)      | 99         | 48 (623400-623957)     | 99         |
| <i>tatAC</i>                                               | -                                                                                                               | -          | -                      | -          | -                      | -          |
| <i>tatAD</i>                                               | 19 (141434-141640)                                                                                              | 95         | 4 (129030-129242)      | 100        | 2 (129006-129218)      | 100        |
| <i>tatAY</i>                                               | 28 (4080-4249)                                                                                                  | 97         | 30 (7614-7793)         | 100        | 24 (46376-46555)       | 100        |

138 <sup>1</sup>If no homologous region is found for any amino acid sequence or gene by using the  
 139 sequence from *B. subtilis*, the corresponding amino acid or gene sequence was obtained from

140 *B. licheniformis* ATCC 14580 (NC\_006322.1). <sup>2</sup>These genes, when extracted from *B.*  
141 *subtilis* genome, had shown no significant homology in table S3A. The way of performing  
142 homology search and colour codes are same as that used in table S3A. Additionally, if the  
143 protein sequences did not show homology, discontinuous megablast with corresponding  
144 nucleotide sequences as queries (instead of amino acid sequences) were used (homologous  
145 regions found in such a way are shown green). The percentage identity in black font  
146 represents amino acid identity and that in green represents nucleotide identity. <sup>3</sup>NSH means  
147 either ‘no significant homology’ or a few reads (1-6) with the coverage depth of 1 could be  
148 aligned when the raw reads from the strain were mapped onto the genome of another strain in  
149 which the related gene is present.

150

151

152

153

154

155

156

157

158

159

160



161 **Table S4: The genes involved in the metabolism of phosphate in *B. subtilis* 168 and the**  
 162 **regions of their homologs in *B. licheniformis* strains G-1, F1-1, and F2-1**

| <i>B. subtilis</i><br>gene <sup>1</sup> | Contig, coordinates and % identity in strains of <i>B. licheniformis</i> where the homologous sequence is found |            |                        |            |                        |            |
|-----------------------------------------|-----------------------------------------------------------------------------------------------------------------|------------|------------------------|------------|------------------------|------------|
|                                         | G-1                                                                                                             |            | F1-1                   |            | F2-1                   |            |
|                                         | Contig and coordinates                                                                                          | % identity | Contig and coordinates | % identity | Contig and coordinates | % identity |
| <i>phoA</i>                             | 30 (694901-696289)                                                                                              | 36         | 1 (842971-844359)      | 35         | 35 (420452-421840)     | 35         |
| <i>phoB</i>                             | 30 (694982-696301)                                                                                              | 37         | 1 (842959-844278)      | 37         | 35 (420533-421852)     | 37         |
| <i>phoD</i>                             | 19 (141894-143414)                                                                                              | 81         | 4 (129495-131015)      | 81         | 2 (129471-130991)      | 81         |
|                                         | 30 (229072-230424)                                                                                              | 51         | 1(1358730-1360082)     | 50         | 15 (65390-66742)       | 50         |
| <i>phoH</i>                             | 30 ( 553247-554197)                                                                                             | 84         | 1 (1055764-1056714)    | 84         | 35 (282368-283318)     | 84         |
| <i>ppaC</i>                             | 15 (493163-494083)                                                                                              | 75         | 25 (81444-82364)       | 74         | 1 (234658-235578)      | 74         |
| <i>xpaC</i>                             | 2 (54572-55183)                                                                                                 | 55         | 14 (597-1208)          | 55         | 4 (54493-55104)        | 55         |
| <i>ybfM</i>                             | 4 (73468-73947)                                                                                                 | 63         | 1 (956179-956658)      | 62         | 13 (71975-72454)       | 62         |
| <i>ykoX</i>                             | 35 (6885-7541)                                                                                                  | 71         | 8 (534405-535061)      | 71         | 48 (473889-474545)     | 71         |

|             |                    |    |                   |    |                    |    |
|-------------|--------------------|----|-------------------|----|--------------------|----|
| <i>ylaK</i> | 31 (108469-109764) | 82 | 1 (14680-15975)   | 81 | 27 (14674-15969)   | 81 |
| <i>yngC</i> | 32 (102724-103284) | 79 | 8 (350458-351018) | 79 | 48 (330053-330613) | 79 |

163 <sup>1</sup>Homology for the proteins encoded by these genes were searched with TBLASTN using  
164 BLOSUM62 matrix in the three target strains, and if the region of significant homology was  
165 not achieved using this matrix, BLOSUM45 matrix was used. The contigs and coordinates of  
166 genes for which query coverage was 95% or less are coloured brown. The percentage identity  
167 represents amino acid identity.

168

169

170

171

172

173

174

175

176

177

178

179 **Table S5: The genes involved in the metabolism of sulphur in *B. subtilis* 168 and the**  
 180 **regions of their homologs in *B. licheniformis* strains G-1, F1-1, and F2-1**

| <i>B. subtilis</i><br>gene <sup>1</sup> | Contig, coordinates and % identity in strains of <i>B. licheniformis</i> where the homologous sequence is found |            |                        |            |                        |            |
|-----------------------------------------|-----------------------------------------------------------------------------------------------------------------|------------|------------------------|------------|------------------------|------------|
|                                         | G-1                                                                                                             |            | F1-1                   |            | F2-1                   |            |
|                                         | Contig and coordinates                                                                                          | % identity | Contig and coordinates | % identity | Contig and coordinates | % identity |
| <i>sat</i>                              | 31 (192696-193814)                                                                                              | 82         | 1 (98912-100030)       | 81         | 27 (98899-100017)      | 81         |
| <i>ssuD</i>                             | 32 (452435-453535)                                                                                              | 78         | 8 (10245-11345)        | 77         | 34 (11648-12748)       | 77         |
| <i>yisZ</i>                             | 31 (193852-194373)                                                                                              | 63         | 1 (1000068-100589)     | 63         | 27 (100055-100576)     | 63         |
| <i>yitA</i>                             | 31 (192708-193814)                                                                                              | 67         | 1 (98924-100030)       | 67         | 27 (98911-100017)      | 67         |
| <i>yitB</i>                             | 31 (190896-191591)                                                                                              | 59         | 1 (97112-97807)        | 59         | 27 (97099-97794)       | 59         |
|                                         | 30 (1131772-1132473)                                                                                            | 67         | 1 (463775-464476)      | 68         | 27 (463817-464518)     | 68         |
| <i>yuiH</i>                             | 4 (114199-114789)                                                                                               | 70         | 1 (915705-916295)      | 69         | 13 (112339-112929)     | 69         |
| <i>yvgQ</i>                             | 32 (76788-78503)                                                                                                | 88         | 8 (370576-372291)      | 88         | 48 (350175-351890)     | 88         |
| <i>yvgR</i>                             | 30 (406375-408072)                                                                                              | 28         | 1 (1169722-1171419)    | 29         | 35 (159028-160725)     | 29         |

|  |                  |    |                   |    |                    |    |
|--|------------------|----|-------------------|----|--------------------|----|
|  | 32 (78534-80360) | 76 | 8 (368719-370545) | 76 | 48 (348318-350144) | 76 |
|--|------------------|----|-------------------|----|--------------------|----|

181 Homology for the proteins encoded by these genes were searched with TBLASTN using  
182 BLOSUM62 matrix in the three target strains, and if the region of significant homology was  
183 not achieved using this matrix, BLOSUM45 matrix was used. The contigs and coordinates of  
184 genes for which query coverage was 95% or less are coloured brown. The percentage identity  
185 represents amino acid identity.

186

187

188

189

190

191

192

193

194

195

196

197

198

199 **Table S6A: The genes involved in transformation/ competence in *B. subtilis* 168 and the**  
 200 **regions of their homologs in *B. licheniformis* strains G-1, F1-1, and F2-1**

| <i>B. subtilis</i><br>gene <sup>1</sup> | Contig, coordinates and % identity in strains of <i>B. licheniformis</i> where the homologous sequence is found |            |                        |            |                        |            |
|-----------------------------------------|-----------------------------------------------------------------------------------------------------------------|------------|------------------------|------------|------------------------|------------|
|                                         | G-1                                                                                                             |            | F1-1                   |            | F2-1                   |            |
|                                         | Contig and coordinates                                                                                          | % identity | Contig and coordinates | % identity | Contig and coordinates | % identity |
| <i>cinA</i>                             | 31 (331075-332322)                                                                                              | 76         | 1 (237220-238467)      | 76         | 27 (237284-238531)     | 76         |
| <i>comC</i>                             | 30 (322072-322764)                                                                                              | 47         | 1 (1254975-1255667)    | 47         | 35 (74766-75458)       | 46         |
| <i>comEA</i>                            | NSH <sup>2</sup>                                                                                                | -          | NSH                    | -          | NSH                    | -          |
| <i>comEB</i>                            | 30 (525006-525572)                                                                                              | 84         | 1 (1082121-1082687)    | 84         | 35 (256395-256961)     | 84         |
| <i>comEC</i>                            | 30 (525709-527889)                                                                                              | 50         | 1 (1079805-1081985)    | 49         | 35 (257097-259277)     | 50         |
| <i>comER</i>                            | 30 (523407-524225)                                                                                              | 71         | 1 (1083469-1084287)    | 71         | 35 (254795-255613)     | 71         |
| <i>comFA</i>                            | 15 (606209-607582)                                                                                              | 57         | 25 (176676-178049)     | 56         | 1 (138980-140353)      | 56         |
| <i>comFB</i>                            | 15 (607655-60792)                                                                                               | 59         | 25 (178122-178394)     | 63         | 1 (138635-138907)      | 63         |
| <i>comFC</i>                            | 15 (607947-608630)                                                                                              | 54         | 25 (178414-179094)     | 52         | 1 (137935-138615)      | 52         |
| <i>comGA</i>                            | 30 (621338-                                                                                                     | 68         | 1 (990984-             | 67         | 35 (347078-            | 67         |

|                         |                        |    |                       |    |                        |    |
|-------------------------|------------------------|----|-----------------------|----|------------------------|----|
|                         | 622390)                |    | 992000)               |    | 348130)                |    |
| <i>comGB</i>            | 30 (622449-<br>623417) | 57 | 1 (989921-<br>990889) | 57 | 35 (348189-<br>349157) | 57 |
| <i>comGC</i>            | 30 (623434-<br>623724) | 70 | 1 (989614-<br>989904) | 67 | 35 (349174-<br>349464) | 67 |
| <i>comGD</i>            | NSH                    | -  | NSH                   | -  | NSH                    | -  |
| <i>comGE</i>            | NSH                    | -  | NSH                   | -  | NSH                    | -  |
| <i>comGF</i>            | NSH                    | -  | NSH                   | -  | NSH                    | -  |
| <i>comGG</i>            | NSH                    | -  | NSH                   | -  | NSH                    | -  |
| <i>comS</i>             | NSH                    | -  | NSH                   | -  | NSH                    | -  |
| <i>comP</i>             | 4 (86188-<br>83876)    | 53 | 1 (943944-<br>946247) | 52 | 13 (82386-<br>84689)   | 52 |
| <i>comX<sup>3</sup></i> | 4 (86236-<br>86379)    | 42 | 1 (943757-<br>943852) | 56 | 13 (84781-<br>84876)   | 56 |
| <i>comZ</i>             | 32 (160686-<br>160865) | 73 | 8 (295423-<br>295602) | 73 | 48 (274150-<br>274329) | 73 |
| <i>mecA</i>             | 32 (137167-<br>137802) | 82 | 8 (317690-<br>318325) | 83 | 48 (297404-<br>298039) | 83 |
| <i>med</i>              | 32 (160891-<br>161832) | 68 | 8 (294456-<br>295397) | 68 | 48 (273183-<br>274124) | 68 |
| <i>rok</i>              | 31 (55210-<br>54698)   | 81 | 8 (621703-<br>622218) | 81 | 48 (604947-<br>605462) | 81 |
| <i>smf</i>              | 31 (242711-<br>243607) | 57 | 1 (148892-<br>149788) | 58 | 27 (148884-<br>149780) | 58 |

|             |                    |    |                   |    |                    |    |
|-------------|--------------------|----|-------------------|----|--------------------|----|
| <i>ylbF</i> | 31 (127732-128124) | 82 | 1 (33907-34299)   | 82 | 27 (33901-34293)   | 82 |
| <i>ypbH</i> | 30 (852347-852928) | 81 | 1 (735681-736262) | 80 | 35 (528167-528748) | 80 |

201 <sup>1</sup>Homology for the proteins encoded by these genes were first searched with TBLASTN  
202 using BLOSUM62 matrix in the contigs of three target strains, and if the region of significant  
203 homology was not achieved using this matrix, BLOSUM45 matrix was used. <sup>2</sup>NSH means  
204 ‘no significant homology’. <sup>3</sup>This is a gene of small size and hence the score below 50 was  
205 used to determine its presence. The genes for which query coverage was 95% or less are  
206 coloured brown. The percentage identity represents amino acid identity.

207

208

209

210

211

212

213

214

215

216

217 **Table S6B: The genes involved in transformation/ competence in *B. licheniformis* ATCC**  
 218 **14580 and the regions of their homologs in *B. licheniformis* strains G-1, F1-1, and F2-1<sup>1</sup>**

| <i>B. licheniformis</i><br>ATCC 14580<br>Gene <sup>2</sup> | Contig, coordinates and % identity in strains of <i>B. licheniformis</i> where the homologous sequence is found |            |                        |            |                        |            |
|------------------------------------------------------------|-----------------------------------------------------------------------------------------------------------------|------------|------------------------|------------|------------------------|------------|
|                                                            | G-1                                                                                                             |            | F1-1                   |            | F2-1                   |            |
|                                                            | Contig and coordinates                                                                                          | % identity | Contig and coordinates | % identity | Contig and coordinates | % identity |
| <i>comEA</i>                                               | 30 (524308-524934)                                                                                              | 89         | 1 (1082759-1083385)    | 99         | 35 (255697-256323)     | 99         |
| <i>comGD</i>                                               | 30 (623733-624167)                                                                                              | 90         | 1 (989171-989605)      | 100        | 35 (349473-349907)     | 100        |
| <i>comGE</i>                                               | 30 (624154-624498)                                                                                              | 90         | 1 (988840-989184)      | 100        | 35 (349894-350238)     | 100        |
| <i>comGF</i>                                               | 30 (624410-624895)                                                                                              | 83         | 1 (988443-988928)      | 100        | 35 (350150-350635)     | 99         |
| <i>comGG</i>                                               | 30 (624910-625272)                                                                                              | 85         | 1 (988065-988427)      | 99         | 35 (350651-351013)     | 99         |
| <i>ComS</i>                                                | 19 (5043-5276)                                                                                                  | 87         | 11 (4282-4516)         | 99         | 10 (4664-4897)         | 99         |

219 <sup>1</sup>If no homologous region is found for any amino acid sequence or gene by using the  
 220 sequence from *B. subtilis*, the corresponding amino acid or gene sequence was obtained from  
 221 *B. licheniformis* ATCC 14580 (NC\_006322.1) and homology search was performed similar  
 222 to those for the genes in table S6A. <sup>2</sup>These genes, when extracted from *B. subtilis* genome,  
 223 showed no significant homology in table S6A.



224 **Table S7A: The genes involved in the sporulation in *B. subtilis* 168 and the regions of**  
 225 **their homologs in *B. licheniformis* strains G-1, F1-1, and F2-1**

| <i>B. subtilis</i><br>gene <sup>1</sup> | Contig, coordinates and % identity in strains of <i>B. licheniformis</i> where the homologous sequence is found |            |                        |            |                        |            |
|-----------------------------------------|-----------------------------------------------------------------------------------------------------------------|------------|------------------------|------------|------------------------|------------|
|                                         | G-1                                                                                                             |            | F1-1                   |            | F2-1                   |            |
|                                         | Contig and coordinates                                                                                          | % identity | Contig and coordinates | % identity | Contig and coordinates | % identity |
| <i>bofA</i>                             | NSH <sup>2</sup>                                                                                                | -          | NSH                    | -          | NSH                    | -          |
| <i>bofC</i>                             | 30 (348867-349322)                                                                                              | 63         | 1 (1228414-1228806)    | 68         | 35 (101627-102019)     | 68         |
| <i>cgeA</i>                             | NSH                                                                                                             | -          | NSH                    | -          | NSH                    | -          |
| <i>cgeB</i>                             | NSH                                                                                                             | -          | NSH                    | -          | NSH                    | -          |
| <i>cgeC</i>                             | NSH                                                                                                             | -          | NSH                    | -          | NSH                    | -          |
| <i>cgeD</i>                             | NSH                                                                                                             | -          | NSH                    | -          | NSH                    | -          |
| <i>cgeE</i>                             | 30 (971390-972139)                                                                                              | 49         | 1 (616732-617484)      | 48         | 35 (646943-647695)     | 48         |
| <i>cotA</i>                             | 12 (22497-24023)                                                                                                | 66         | 30 (64813-66339)       | 66         | 29 (53165-54691)       | 66         |
| <i>cotB</i>                             | NSH                                                                                                             | -          | NSH                    | -          | NSH                    | -          |
| <i>cotC</i>                             | NSH                                                                                                             | -          | NSH                    | -          | NSH                    | -          |
| <i>cotD</i>                             | NSH                                                                                                             | -          | NSH                    | -          | NSH                    | -          |
| <i>cotE</i>                             | 31 (342521-343066)                                                                                              | 91         | 1 (248663-249208)      | 91         | 27 (248727-249272)     | 91         |
| <i>cotF</i>                             | 15 (29361-29825)                                                                                                | 64         | 7 (29566-29102)        | 65         | 14 (15493-15963)       | 65         |

|              |                        |    |                       |    |                        |    |
|--------------|------------------------|----|-----------------------|----|------------------------|----|
| <i>cotG</i>  | NSH                    | -  | NSH                   | -  | NSH                    | -  |
| <i>cotH</i>  | 32 (219185-<br>220270) | 45 | 8 (241045-<br>242115) | 46 | 48 (219985-<br>221055) | 45 |
| <i>cotJA</i> | NSH                    | -  | NSH                   | -  | NSH                    | -  |
| <i>cotJB</i> | NSH                    | -  | NSH                   | -  | NSH                    | -  |
| <i>cotJC</i> | 32 (245479-<br>246045) | 89 | 8 (217608-<br>218174) | 89 | 48 (194158-<br>194724) | 89 |
| <i>cotM</i>  | NSH                    | -  | NSH                   | -  | NSH                    | -  |
| <i>cotP</i>  | NSH                    | -  | NSH                   | -  | NSH                    | -  |
| <i>cotS</i>  | NSH                    | -  | NSH                   | -  | NSH                    | -  |
| <i>cotSA</i> | NSH                    | -  | NSH                   | -  | NSH                    | -  |
| <i>cotT</i>  | NSH                    | -  | NSH                   | -  | NSH                    | -  |
| <i>cotV</i>  | NSH                    | -  | NSH                   | -  | NSH                    | -  |
| <i>cotW</i>  | NSH                    | -  | NSH                   | -  | NSH                    | -  |
| <i>cotX</i>  | NSH                    | -  | NSH                   |    | NSH                    | -  |
| <i>cotY</i>  | 32 (109138-<br>109614) | 82 | 8 (344100-<br>344558) | 82 | 48 (323683-<br>324141) |    |
| <i>cotZ</i>  | 32 (109786-<br>110217) | 70 | 8 (343473-<br>343898) | 70 | 48 (323056-<br>323481) |    |
| <i>coxA</i>  | NSH                    | -  | NSH                   | -  | NSH                    | -  |
| <i>csgA</i>  | NSH                    | -  | NSH                   | -  | NSH                    | -  |
| <i>jag</i>   | 15 (11829-<br>12449)   | 60 | 7 (11573-<br>12193)   | 60 | 14 (32872-<br>33492)   | 60 |
| <i>kapB</i>  | NSH                    | -  | NSH                   | -  | NSH                    | -  |

|             |                    |    |                     |    |                    |    |
|-------------|--------------------|----|---------------------|----|--------------------|----|
| <i>kapD</i> | 4 (64801-65415)    | 77 | 1 (964743-965357)   | 77 | 13 (63277-63891)   | 77 |
| <i>kbaA</i> | 13 (79313-79906)   | 73 | 10 (1176-1769)      | 74 | 7 (1172-1765)      | 74 |
| <i>kipA</i> | 8 (113843-114844)  | 55 | 17 (99641-100642)   | 56 | 12 (99577-100578)  | 55 |
| <i>kipI</i> | 8 (114859-115548)  | 67 | 17 (100657-101346)  | 67 | 12 (100593-101282) | 67 |
| <i>obg</i>  | 30 (334109-335392) | 89 | 1 (1242358-1243641) | 89 | 35 (86792-88075)   | 89 |
| <i>phrA</i> | NSH                | -  | NSH                 | -  | NSH                | -  |
| <i>phrC</i> | NSH                | -  | NSH                 | -  | NSH                | -  |
| <i>phrE</i> | NSH                | -  | NSH                 | -  | NSH                | -  |
| <i>phrF</i> | NSH                | -  | NSH                 | -  | NSH                | -  |
| <i>phrG</i> | NSH                | -  | NSH                 | -  | NSH                | -  |
| <i>phrI</i> | NSH                | -  | NSH                 | -  | NSH                | -  |
| <i>phrK</i> | NSH                | -  | NSH                 | -  | NSH                | -  |
| <i>rapA</i> | 11 (27088-27774)   | 46 | 8 (387-1499)        | 48 | 48 (550895-551707) | 50 |
|             | 30 (813891-815006) | 54 | 1 (774210-775325)   | 54 | 35 (489102-490217) | 54 |
|             | 32 (329446-330561) | 42 | 8 (131188-132303)   | 42 | 48 (107741-108856) | 42 |
|             | 7 (5759-6868)      | 45 | -                   | -  | -                  | -  |

|             |                    |    |                   |    |                    |    |
|-------------|--------------------|----|-------------------|----|--------------------|----|
|             | 14 (3684-4796)     | 36 | 19 (35058-36164)  | 37 | -                  | -  |
|             | 5 (20294-21388)    | 35 | -                 | -  | -                  | -  |
|             | 31 (404884-406002) | 41 | -                 | -  | -                  | -  |
|             | 31 (350340-351455) | 51 | -                 | -  | -                  | -  |
| <i>rapB</i> | 30 (813888-815006) | 50 | 1 (774210-775328) | 51 | 35 (489099-490217) | 51 |
|             | 14 (3687-4796)     | 37 | -                 | -  | 36 (597-1706)      | 37 |
|             | 31 (350340-351455) | 41 | 8 (393-1499)      | 40 | -                  | -  |
|             | 32 (329446-330549) | 37 | 8 (131200-132303) | 37 | 48 (107753-108856) | 37 |
|             | 7 (5759-6862)      | 40 | -                 | -  | -                  | -  |
|             | 5 (20294-21385)    | 38 | -                 | -  | -                  | -  |
|             | 31 (404893-406002) | 38 | -                 | -  | -                  | -  |
| <i>rapC</i> | 31 (350340-351455) | 41 | 8 (390-1499)      | 38 | 48 (550877-551698) | 41 |
|             | 30 (813891-815006) | 47 | 1 (774210-775325) | 48 | 35 (489102-490217) | 48 |

|             |                    |    |                   |    |                    |    |
|-------------|--------------------|----|-------------------|----|--------------------|----|
|             | 7 (5759-6865)      | 39 | 19 (35058-36167)  | 33 | 36 (594-1706)      | 33 |
|             | 31 (404887-406002) | 37 | 8 (131203-132303) | 37 | 48 (107756-108856) | 37 |
| <i>rapD</i> | 4 (4814-5797)      | 37 | 15 (4804-5820)    | 36 | 13 (4800-5816)     | 36 |
| <i>rapE</i> | 7 (5759-6865)      | 47 | 1 (774210-775331) | 47 | 35 (489096-490217) | 47 |
|             | 30 (813885-815006) | 48 | 8 (390-1499)      | 48 | 48 (550862-551695) | 41 |
|             | 31 (404908-406002) | 35 | 19 (35058-36146)  | 35 | 13 (166366-167454) | 35 |
|             | 31 (350331-351455) | 75 | -                 | -  | 48 (107756-108856) | 38 |
| <i>rapF</i> | 14 (3678-4784)     | 33 | 19 (35058-36170)  | 34 | 36 (588-1694)      | 33 |
|             | 7 (5759-6865)      | 35 | -                 | -  | -                  | -  |
|             | 30 (813891-815006) | 38 | -                 | -  | -                  | -  |
|             | 31 (404887-406002) | 36 | 8 (390-1499)      | 37 | -                  | -  |
|             | 31 (350340-351455) | 45 | 1 (774210-775325) | 45 | 35 (489102-490217) | 45 |

|             |                    |    |                    |    |                    |    |
|-------------|--------------------|----|--------------------|----|--------------------|----|
|             | 5 (20285-21394)    | 34 | 8 (131203-132303)  | 35 | -                  | -  |
| <i>rapG</i> | 12 (102920-103969) | 42 | 30 (138738-139736) | 42 | 29 (127279-128277) | 42 |
|             | 32 (253781-254869) | 52 | 8 (206714-207805)  | 51 | 48 (183267-184358) | 51 |
| <i>rapH</i> | 7 (5777-6868)      | 41 | 1 (774228-775337)  | 44 | 35 (489090-490199) | 44 |
|             | 30 (813879-814988) | 45 | -                  | -  | -                  | -  |
|             | 31 (1-522)         | 68 | -                  | -  | 48 (550877-551707) | 53 |
|             | 31 (350340-351446) | 40 | -                  | -  | -                  | -  |
| <i>rapI</i> | 31 (404860-406005) | 45 | 8 (131194-132306)  | 42 | 36 (597-1703)      | 45 |
|             | 5 (20279-21385)    | 45 | 19 (35052-36161)   | 44 | 13 (166360-167469) | 44 |
|             | 4 (132799-133881)  | 34 | 1 (899341-900423)  | 34 | 13 (128214-129296) | 34 |
|             | 14 (3687-4793)     | 45 | 1 (774225-775328)  | 41 | 35 (489099-490202) | 41 |
|             | 31 (350355-        | 36 | -                  | -  | -                  | -  |

|             |                    |    |                    |    |                    |    |
|-------------|--------------------|----|--------------------|----|--------------------|----|
|             | 351452)            |    |                    |    |                    |    |
|             | 7 (5762-6868)      | 33 | 8 (387-1496)       | 34 | -                  | -  |
| <i>rapJ</i> | 30 (813879-814979) | 47 | 1 (774237-775337)  | 47 | 35 (489090-490190) | 47 |
|             | 31 (404884-405978) | 40 | 8 (131191-132279)  | 41 | 48 (107744-108832) | 41 |
|             | 14 (3687-4742)     | 39 | 8 (393-1487)       | 38 | 48 (550862-551695) | 39 |
|             | 5 (20330-21385)    | 38 | 19 (35064-36161)   | 38 | 36 (597-1652)      | 38 |
|             | 31 (350334-351335) | 42 | -                  | -  | -                  | -  |
|             | 7 (5771-6862)      | 36 | -                  | -  | -                  | -  |
|             | 31 (329470-330558) | 42 | -                  | -  | -                  | -  |
| <i>rapK</i> | 12 (102920-104011) | 47 | 30 (138738-139829) | 46 | 29 (127279-128370) | 46 |
|             | 32 (253775-254869) | 41 | 8 (206714-207811)  | 41 | 48 (183267-184364) | 41 |
| <i>rsfA</i> | 15 (386026-386811) | 76 | 5 (65941-66726)    | 77 | 6 (23401-24186)    | 76 |
| <i>safA</i> | 30 (342308-        | 48 | 1 (1234633-        | 50 | 35 (94988-         | 50 |

|                |                        |    |                         |    |                        |    |
|----------------|------------------------|----|-------------------------|----|------------------------|----|
|                | 343126)                |    | 1235445)                |    | 95800)                 |    |
| <i>sda</i>     | NSH                    | -  | NSH                     | -  | NSH                    | -  |
| <i>seaA</i>    | 30 (864117-<br>865010) | 77 | 1 (723599-<br>724492)   | 76 | 35 (539937-<br>540830) | 76 |
| <i>sinI</i>    | NSH                    | -  | NSH                     | -  | NSH                    | -  |
| <i>soj</i>     | 15 (19418-<br>20176)   | 94 | 7 (19161-<br>19919)     | 94 | 14 (25146-<br>25904)   | 94 |
| <i>splB</i>    | 31 (23046-<br>24071)   | 90 | 8 (590089-<br>591114)   | 90 | 48 (573333-<br>574358) | 90 |
| <i>spmA</i>    | 30 (826745-<br>827870) | 88 | 1 (761386-<br>761925)   | 87 | 35 (502503-<br>503042) | 87 |
| <i>spmB</i>    | 30 (827337-<br>827870) | 81 | 1 (760800-<br>761333)   | 82 | 35 (503095-<br>503628) | 82 |
| <i>spo0B</i>   | 30 (333498-<br>334064) | 57 | 1 (1243686-<br>1244252) | 58 | 35 (86181-<br>86747)   | 59 |
| <i>spo0E</i>   | NSH                    | -  | NSH                     | -  | NSH                    | -  |
| <i>spo0J</i>   | 15 (20172-<br>21017)   | 82 | 7 (19915-<br>20760)     | 82 | 14 (24305-<br>25150)   | 82 |
| <i>spo0M</i>   | NSH                    | -  | NSH                     | -  | NSH                    | -  |
| <i>spoIIAA</i> | 30 (802163-<br>802510) | 83 | 1 (786703-<br>787053)   | 87 | 35 (477375-<br>477725) | 84 |
| <i>spoIIAB</i> | 30 (802513-<br>802950) | 88 | 1 (786266-<br>786703)   | 89 | 35 (477725-<br>478162) | 89 |



|                  |                        |    |                         |    |                        |    |
|------------------|------------------------|----|-------------------------|----|------------------------|----|
| <i>spoIIB</i>    | 30 (323042-<br>324010) | 48 | 1 (1253734-<br>1254699) | 49 | 35 (75734-<br>76699)   | 49 |
| <i>spoIID</i>    | 15 (448305-<br>449318) | 70 | 25 (38589-<br>39602)    | 71 | 1 (277424-<br>278437)  | 71 |
| <i>spoIIE</i>    | 2 (17538-<br>20024)    | 81 | 14 (35691-<br>38177)    | 82 | 4 (17524-<br>20010)    | 82 |
| <i>spoIIIGA</i>  | 31 (164235-<br>165161) | 69 | 1 (70406-<br>71332)     | 69 | 27 (70400-<br>71326)   | 69 |
| <i>spoIIIAA</i>  | 30 (647709-<br>648629) | 66 | 1 (890437-<br>891357)   | 65 | 35 (373455-<br>374375) | 65 |
| <i>spoIIIBAB</i> | 30 (648626-<br>649093) | 72 | 1 (889970-<br>890440)   | 74 | 35 (374372-<br>374842) | 74 |
| <i>spoIIIBAC</i> | 30 (649164-<br>649367) | 82 | 1 (889699-<br>889902)   | 82 | 35 (374910-<br>375113) | 82 |
| <i>spoIIIBAD</i> | 30 (649383-<br>649775) | 92 | 1 (889291-<br>889683)   | 92 | 35 (375129-<br>375521) | 92 |
| <i>spoIIIBAE</i> | 30 (649941-<br>650951) | 84 | 1 (888115-<br>889125)   | 84 | 35 (375687-<br>376697) | 84 |
| <i>spoIIIBAF</i> | 30 (651017-<br>651643) | 64 | 1 (887423-<br>888049)   | 63 | 35 (376763-<br>377389) | 63 |
| <i>spoIIIBAG</i> | 30 (651639-<br>652331) | 70 | 1 (886735-<br>887427)   | 70 | 35 (377385-<br>378077) | 70 |
| <i>spoIIIBAH</i> | 30 (652338-<br>652967) | 59 | 1 (886099-<br>886728)   | 60 | 35 (378084-<br>378713) | 60 |
| <i>spoIIIBE</i>  | 30 (140570-<br>140570) | 56 | 28 (103584-<br>103584)  | 57 | 49 (105240-<br>105240) | 57 |

|                |                        |    |                         |    |                        |    |
|----------------|------------------------|----|-------------------------|----|------------------------|----|
|                | 141967)                |    | 104981)                 |    | 106637)                |    |
|                | 31 (320104-<br>322380) | 81 | 1 (226251-<br>228524)   | 82 | 27 (226315-<br>228588) | 82 |
| <i>spoIIIJ</i> | 15 (11062-<br>11775)   | 83 | 7 (10776-<br>11519)     | 83 | 14 (34289-<br>33546)   | 83 |
| <i>spoIIM</i>  | 30 (796068-<br>796700) | 78 | 1 (792516-<br>793148)   | 79 | 35 (471280-<br>471912) | 79 |
| <i>spoIIP</i>  | 30 (533424-<br>534620) | 70 | 1 (1075344-<br>1076540) | 71 | 35 (262542-<br>263738) | 71 |
|                | -                      | -  | -                       | -  | 35 (235384-<br>236370) | 48 |
| <i>spoIIQ</i>  | 15 (482749-<br>483441) | 84 | 25 (72705-<br>73397)    | 85 | 1 (243625-<br>244317)  | 85 |
| <i>spoIIR</i>  | 15 (430650-<br>431306) | 64 | 25 (20922-<br>21584)    | 66 | 1 (295448-<br>296110)  | 66 |
| <i>spoIISA</i> | 32 (34688-<br>35428)   | 66 | 8 (417163-<br>417903)   | 66 | 48 (396891-<br>397631) | 66 |
| <i>spoIISB</i> | NSH                    | -  | NSH                     | -  | NSH                    | -  |
| <i>spoIVA</i>  | 30 (869204-<br>870679) | 95 | 1 (717926-<br>719401)   | 95 | 35 (545028-<br>546503) | 95 |
| <i>spoIVB</i>  | 30 (665138-<br>666346) | 81 | 1 (872716-<br>873987)   | 80 | 35 (390825-<br>392096) | 80 |
| <i>spoIVCA</i> | NSH                    | -  | NSH                     | -  | NSH                    | -  |
| <i>spoIVFA</i> | 30 (330504-<br>331292) | 57 | 1 (124653-<br>1247241)  | 57 | 35 (83192-<br>83980)   | 56 |

|                |                    |    |                     |    |                    |    |
|----------------|--------------------|----|---------------------|----|--------------------|----|
| <i>spoIVFB</i> | 30 (331288-332151) | 69 | 1 (1245594-1246457) | 70 | 35 (83976-84839)   | 70 |
| <i>spoVAA</i>  | 30 (803886-804440) | 63 | 1 (784761-785315)   | 62 | 35 (479113-479667) | 62 |
| <i>spoVAB</i>  | NSH                | -  | NSH                 | -  | NSH                | -  |
| <i>spoVAC</i>  | 30 (804935-805378) | 84 | 1 (783823-784266)   | 83 | 35 (480162-480605) | 83 |
| <i>spoVAD</i>  | 30 (805397-806410) | 83 | 1 (782803-783804)   | 83 | 35 (480624-481625) | 83 |
| <i>spoVAE</i>  | 30 (806418-807362) | 75 | 1 (781839-782783)   | 77 | 35 (481645-482589) | 77 |
| <i>spoVAF</i>  | 30 (807337-808806) | 72 | 1 (780395-781864)   | 72 | 35 (482564-484033) | 72 |
|                | 8 (168169-169578)  | 28 | 17 (153916-155325)  | 28 | 12 (153879-155288) | 28 |
|                | -                  | -  | 1 (1002407-1003846) | 45 | 35 (335233-336672) | 45 |
| <i>spoVB</i>   | 30 (355268-356782) | 80 | 1 (1220939-1222453) | 80 | 35 (107980-109494) | 80 |
| <i>spoVC</i>   | 2 (30529-31092)    | 82 | 1 (24635-25198)     | 84 | 4 (30503-31066)    | 84 |
| <i>spoVE</i>   | 31 (149032-150129) | 93 | 1 (55197-56294)     | 94 | 27 (55191-56288)   | 94 |
|                | 33 (6384-7397)     | 42 | 30 (35020-36039)    | 42 | 29 (23372-24391)   | 42 |

|               |                    |    |                    |    |                    |    |
|---------------|--------------------|----|--------------------|----|--------------------|----|
| <i>spoVFA</i> | 31 (312196-313080) | 76 | 1 (218341-219225)  | 76 | 27 (218405-219289) | 76 |
| <i>spoVFB</i> | 31 (313098-313682) | 80 | 1 (219243-219827)  | 81 | 27 (219307-219891) | 81 |
| <i>spoVG</i>  | 2 (34562-34852)    | 90 | 14 (20872-21162)   | 89 | 4 (34539-34829)    | 89 |
| <i>spoVID</i> | NSH                | -  | NSH                | -  | NSH                | -  |
| <i>spoVK</i>  | 31 (422741-423694) | 89 | 1 (305170-306123)  | 89 | 27 (305234-306187) | 89 |
| <i>spoVM</i>  | NSH                | -  | NSH                | -  | NSH                | -  |
| <i>spoVR</i>  | 32 (390286-391692) | 89 | 8 (72249-73655)    | 89 | 48 (45986-47392)   | 88 |
| <i>spoVS</i>  | 31 (336527-336784) | 84 | 1 (242670-242927)  | 84 | 27 (242734-242991) | 84 |
| <i>spsA</i>   | NSH                | -  | NSH                | -  | NSH                | -  |
| <i>spsB</i>   | NSH                | -  | NSH                | -  | NSH                | -  |
| <i>spsC</i>   | NSH                | -  | NSH                | -  | NSH                | -  |
| <i>spsD</i>   | NSH                | -  | NSH                | -  | NSH                | -  |
| <i>spsE</i>   | NSH                | -  | NSH                | -  | NSH                | -  |
| <i>spsF</i>   | NSH                | -  | NSH                | -  | NSH                | -  |
| <i>spsG</i>   | NSH                | -  | NSH                | -  | NSH                | -  |
| <i>spsI</i>   | 15 (584464-585147) | 28 | 25 (152042-152725) | 29 | 1 (164298-164981)  | 29 |
| <i>spsJ</i>   | 9 (100419-         | 30 | 3 (2162-3088)      | 30 | 9 (2288-3214)      | 30 |

|             |                        |    |                        |    |                        |    |
|-------------|------------------------|----|------------------------|----|------------------------|----|
|             | 101345)                |    |                        |    |                        |    |
|             | 32 (101648-<br>102604) | 29 | 5 (8525-9481)          | 28 | 6 (80643-<br>81599)    | 28 |
|             | 15 (594349-<br>595245) | 29 | 16 (46846-<br>47820)   | 27 | 8 (11175-<br>12149)    | 27 |
|             | 15 (328611-<br>329567) | 28 | 25 (164797-<br>165693) | 28 | 1 (151336-<br>152232)  | 28 |
|             | 15 (92027-<br>93001)   | 27 | 8 (351138-<br>352094)  | 28 | 48 (330737-<br>331693) | 28 |
| <i>spsK</i> | NSH                    | -  | NSH                    | -  | NSH                    | -  |
| <i>spsL</i> | NSH                    | -  | NSH                    | -  | NSH                    | -  |
| <i>sspA</i> | NSH                    | -  | NSH                    | -  | NSH                    | -  |
| <i>sspB</i> | NSH                    | -  | NSH                    | -  | NSH                    | -  |
| <i>sspC</i> | 32 (344208-<br>344375) | 80 | 8 (117377-<br>117544)  | 82 | 48 (93930-<br>94097)   | 82 |
| <i>sspD</i> | NSH                    | -  | NSH                    | -  | NSH                    | -  |
| <i>sspE</i> | NSH                    | -  | NSH                    | -  | NSH                    | -  |
| <i>sspF</i> | NSH                    | -  | NSH                    | -  | NSH                    | -  |
| <i>sspG</i> | NSH                    | -  | NSH                    | -  | NSH                    | -  |
| <i>sspH</i> | NSH                    | -  | NSH                    | -  | NSH                    | -  |
| <i>sspI</i> | NSH                    | -  | NSH                    | -  | NSH                    | -  |
| <i>sspJ</i> | NSH                    | -  | NSH                    | -  | NSH                    | -  |
| <i>sspK</i> | NSH                    | -  | NSH                    | -  | NSH                    | -  |
| <i>sspL</i> | NSH                    | -  | NSH                    | -  | NSH                    | -  |

|             |                        |    |                       |    |                        |    |
|-------------|------------------------|----|-----------------------|----|------------------------|----|
| <i>sspM</i> | NSH                    | -  | NSH                   | -  | NSH                    | -  |
| <i>sspN</i> | NSH                    | -  | NSH                   | -  | NSH                    | -  |
| <i>sspO</i> | NSH                    | -  | NSH                   | -  | NSH                    | -  |
| <i>sspP</i> | NSH                    | -  | NSH                   | -  | NSH                    | -  |
| <i>tasA</i> | 30 (627556-<br>628347) | 71 | 1 (984996-<br>985787) | 71 | 35 (353291-<br>354082) | 71 |
| <i>tgl</i>  | 4 (42936-<br>43670)    | 60 | 15 (40084-<br>40818)  | 61 | 13 (41168-<br>41902)   | 61 |
| <i>tlp</i>  | NSH                    | -  | NSH                   | -  | NSH                    | -  |
| <i>usd</i>  | NSH                    | -  | NSH                   | -  | NSH                    | -  |
| <i>yaaH</i> | 23 (13257-<br>14534)   | 77 | 13 (5189-<br>6466)    | 76 | 33 (5184-<br>6461)     | 77 |
|             | 31 (370187-<br>371335) | 35 | 1 (273629-<br>274777) | 35 | 27 (274842-<br>273694) | 35 |
| <i>yabG</i> | 2 (38384-<br>39250)    | 79 | 14 (16532-<br>17398)  | 79 | 4 (38303-<br>39169)    | 79 |
| <i>ydhD</i> | 23 (13311-<br>14540)   | 33 | 13 (5183-<br>6412)    | 33 | 33 (5178-<br>6407)     | 33 |
|             | 31 (370172-<br>371440) | 54 | 1 (273626-<br>274882) | 55 | 27 (273691-<br>274947) | 55 |
| <i>yknT</i> | 31 (55382-<br>56311)   | 52 | 8 (622391-<br>623332) | 52 | 48 (605635-<br>606576) | 52 |
| <i>ykuD</i> | 31 (40557-<br>41045)   | 75 | 8 (607572-<br>608060) | 75 | 48 (590816-<br>591304) | 75 |

|             |                    |    |                     |    |                    |    |
|-------------|--------------------|----|---------------------|----|--------------------|----|
| <i>ykvU</i> | 31 (9353-10687)    | 76 | 8 (576311-577645)   | 76 | 48 (559558-560892) | 76 |
| <i>ynzH</i> | NSH                | -  | NSH                 | -  | NSH                | -  |
| <i>yobW</i> | NSH                | -  | NSH                 | -  | NSH                | -  |
| <i>ypeB</i> | 30 (858401-859750) | 74 | 1 (728857-730206)   | 74 | 35 (534223-535572) | 74 |
| <i>yqfD</i> | 30 (552054-553247) | 71 | 1 (1056714-1057907) | 69 | 35 (281175-282368) | 69 |
| <i>yqgT</i> | 30 (615575-616693) | 59 | 1 (996644-997762)   | 60 | 35 (341316-342434) | 60 |
| <i>yqjG</i> | 30 (689879-690673) | 66 | 1 (848586-849380)   | 66 | 35 (415431-416225) | 66 |
| <i>yraD</i> | 31 (369576-369872) | 51 | 1 (273018-273314)   | 51 | 27 (273083-273379) | 51 |
| <i>yraE</i> | NSH                | -  | NSH                 | -  | NSH                | -  |
| <i>yraF</i> | NSH                | -  | NSH                 | -  | NSH                | -  |
| <i>yraG</i> | NSH                | -  | NSH                 | -  | NSH                | -  |
| <i>yrbC</i> | 30 (344293-345006) | 74 | 1 (1232745-1233458) | 73 | 35 (96975-97688)   | 73 |
| <i>ytaA</i> | NSH                | -  | NSH                 | -  | NSH                | -  |
| <i>ytgP</i> | 30 (115621-117237) | 75 | 28 (80546-82162)    | 76 | 49 (82203-83819)   | 76 |
| <i>ytpT</i> | 31 (320974-322368) | 56 | 1 (227118-228512)   | 57 | 27 (227182-228576) | 57 |

|             |                    |    |                    |    |                    |    |
|-------------|--------------------|----|--------------------|----|--------------------|----|
|             | 30 (140411-141958) | 82 | 28 (103404-104972) | 81 | 49 (105060-106628) | 81 |
| <i>yyaA</i> | 15 (16901-17749)   | 88 | 7 (16644-17492)    | 89 | 14 (27573-28421)   | 89 |

226 <sup>1</sup>Homology for the proteins encoded by these genes were first searched with TBLASTN  
227 using BLOSUM62 matrix in the contigs of three target strains, and if the region of significant  
228 homology was not achieved using this matrix, BLOSUM45 was used. If the protein  
229 sequences did not show homology using this approach, discontinuous megablast with  
230 corresponding gene sequences as queries were used (homologous regions found in such a  
231 way are shown green). <sup>2</sup>NSH means 'no significant homology'. The contigs and coordinates  
232 of the genes for which query coverage was 95% or less are coloured brown. The percentage  
233 identity in black and brown fonts represents amino acid identity and that in the green  
234 represents nucleotide identity.

235

236

237

238

239

240

241

242



243 **Table S7B: The genes involved in the sporulation in *B. licheniformis* ATCC 14580 and**  
 244 **the regions of their homologs in *B. licheniformis* strains G-1, F1-1, and F2-1<sup>1</sup>**

| <i>B. licheniformis</i><br>ATCC 14580<br>gene <sup>2</sup> | Contig and coordinates in strains of <i>B. licheniformis</i> where the homologous sequence is found |            |                        |            |                        |            |
|------------------------------------------------------------|-----------------------------------------------------------------------------------------------------|------------|------------------------|------------|------------------------|------------|
|                                                            | G-1                                                                                                 |            | F1-1                   |            | F2-1                   |            |
|                                                            | Contig and coordinates                                                                              | % identity | Contig and coordinates | % identity | Contig and coordinates | % identity |
| <i>bofA</i>                                                | 23 (19173-19439)                                                                                    | 98         | 13 (283-549)           | 100        | 33 (278-544)           | 100        |
| <i>cgeA</i>                                                | -                                                                                                   | -          | -                      | -          | -                      | -          |
| <i>cgeB</i>                                                | -                                                                                                   | -          | -                      | -          | -                      | -          |
| <i>cgeC</i>                                                | -                                                                                                   | -          | -                      | -          | -                      | -          |
| <i>cgeD</i>                                                | -                                                                                                   | -          | -                      | -          | -                      | -          |
| <i>cotB</i>                                                | -                                                                                                   | -          | -                      | -          | -                      | -          |
| <i>cotC</i>                                                | -                                                                                                   | -          | -                      | -          | -                      | -          |
| <i>cotD</i>                                                | 30 (923998-924267)                                                                                  | 96         | 1 (664326-664595)      | 100        | 35 (599833-600102)     | 100        |
| <i>cotG</i>                                                | -                                                                                                   | -          | -                      | -          | -                      | -          |
| <i>cotJA</i>                                               | 32 (246336-246569)                                                                                  | 97         | 8 (217084-217317)      | 99         | 48 (193634-193867)     | 100        |
| <i>cotJB</i>                                               | 32 (246067-246330)                                                                                  | 94         | 8 (217323-217586)      | 100        | 48 (193873-194136)     | 100        |
| <i>cotM</i>                                                | 6 (34041-34445)                                                                                     | 90         | 1 (346002-346406)      | 100        | 27 (346039-346443)     | 100        |
| <i>cotP</i>                                                | -                                                                                                   | -          | -                      | -          | -                      | -          |

|              |                                   |    |                         |     |                        |     |
|--------------|-----------------------------------|----|-------------------------|-----|------------------------|-----|
| <i>cotS</i>  | -                                 | -  | -                       |     | -                      | -   |
| <i>cotSA</i> | -                                 | -  | -                       |     | -                      | -   |
| <i>cotT</i>  | -                                 | -  | -                       |     | -                      | -   |
| <i>cotV</i>  | 32 (107643-<br>108026)            | 96 | 8 (345723-<br>346106)   | 100 | 48 (325306-<br>325689) | 100 |
| <i>cotW</i>  | NSH <sup>3</sup>                  | -  | 8 (345276-<br>345671)   | 99  | 48 (324859-<br>325254) | 99  |
| <i>cotX</i>  | 32 (108499-<br>109002)            | 74 | 8 (344693-<br>345202)   | 100 | 48 (324276-<br>324785) | 100 |
| <i>coxA</i>  | 30 (343533-<br>344129)            | 97 | 1 (1233624-<br>1234220) | 99  | 35 (96213-<br>96809)   | 99  |
| <i>csgA</i>  | 19 (185854-<br>186102)            | 98 | 4 (171850-<br>172098)   | 100 | 2 (171826-<br>172074)  | 100 |
| <i>kapB</i>  | 4 (64381-<br>64767)               | 95 | 1 (965391-<br>965777)   | 99  | 13 (62857-<br>63243)   | 99  |
| <i>phrA</i>  | -                                 | -  | -                       | -   | -                      | -   |
| <i>phrC</i>  | -                                 | -  | -                       |     | -                      | -   |
| <i>phrE</i>  | -                                 | -  | -                       | -   | -                      | -   |
| <i>phrF</i>  | -                                 | -  | -                       | -   | -                      | -   |
| <i>phrG</i>  | Raw reads<br>present <sup>4</sup> | -  | 8 (207814-<br>207930)   | 100 | 48 (184367-<br>184483) | 100 |
| <i>phrI</i>  | -                                 | -  | -                       | -   | -                      | -   |
| <i>phrK</i>  | 12 (104029-<br>104111)            | 97 | 30 (139847-<br>139977)  | 100 | 29 (128388-<br>128417) | 100 |

|                |                        |     |                         |     |                        |     |
|----------------|------------------------|-----|-------------------------|-----|------------------------|-----|
|                | 104151)                |     | 139969)                 |     | 128510)                |     |
| <i>sda</i>     | 30 (517799-<br>517939) | 100 | 1 (1089754-<br>1089894) | 100 | 35 (249188-<br>249328) | 100 |
| <i>sinI</i>    | 30 (628824-<br>629000) | 96  | 1 (984343-<br>984519)   | 100 | 35 (354559-<br>354735) | 100 |
| <i>spo0E</i>   | 11 (16043-<br>16285)   | 95  | 8 (557664-<br>557906)   | 100 | 48 (497148-<br>497390) | 100 |
| <i>spo0M</i>   | -                      | -   | -                       | -   | -                      | -   |
| <i>spoIISB</i> | 32 (35434-<br>35607)   | 98  | 8 (416984-<br>417157)   | 99  | 48 (396712-<br>396885) | 99  |
| <i>spoIVCA</i> | NSH                    | -   | NSH                     | -   | NSH                    | -   |
| <i>spoVAB</i>  | 30 (804496-<br>804918) | 99  | 1 (784283-<br>784705)   | 100 | 35 (479723-<br>480145) | 100 |
| <i>spoVID</i>  | 30 (314531-<br>315301) | 90  | 1 (1261606-<br>1262976) | 99  | 35 (67415-<br>68173)   | 99  |
|                | 30 (315647-<br>316126) | 94  | -                       | -   | 35 (68336-<br>68827)   | 100 |
| <i>spoVM</i>   | NSH                    | -   | NSH                     | -   | NSH                    | -   |
| <i>spsA</i>    | -                      | -   | -                       | -   | -                      | -   |
| <i>spsB</i>    | -                      | -   | -                       | -   | -                      | -   |
| <i>spsC</i>    | 9 (94062-<br>95147)    | 95  | 3 (8363-<br>9469)       | 100 | 9 (8489-<br>9595)      | 100 |
| <i>spsD</i>    | -                      | -   | -                       | -   | -                      | -   |

|             |                        |     |                         |     |                        |     |
|-------------|------------------------|-----|-------------------------|-----|------------------------|-----|
| <i>spsE</i> | -                      | -   | -                       | -   | -                      | -   |
| <i>spsF</i> | -                      | -   | -                       | -   | -                      | -   |
| <i>spsG</i> | -                      | -   | -                       | -   | -                      | -   |
| <i>spsI</i> | -                      | -   | -                       | -   | -                      | -   |
| <i>spsJ</i> | -                      | -   | -                       | -   | -                      | -   |
| <i>spsK</i> | -                      | -   | -                       | -   | -                      | -   |
| <i>spsL</i> | -                      | -   | -                       | -   | -                      | -   |
| <i>sspA</i> | 30 (168453-<br>168665) | 100 | 1 (1421105-<br>1421317) | 100 | 15 (4159-<br>4371)     | 100 |
| <i>sspB</i> | 32 (344181-<br>344384) | 98  | 8 (117368-<br>117571)   | 100 | 48 (93921-<br>94124)   | 100 |
| <i>sspC</i> | -                      | -   | -                       | -   | -                      | -   |
| <i>sspD</i> | 35 (3491-<br>3688)     | 96  | 8 (538255-<br>538452)   | 100 | 48 (477739-<br>477936) | 100 |
| <i>sspE</i> | 9 (14226-<br>14390)    | 100 | 3 (88391-<br>88555)     | 100 | 9 (88518-<br>88682)    | 100 |
| <i>sspF</i> | 2 (37542-<br>37727)    | 96  | 14 (18055-<br>18240)    | 100 | 4 (37461-<br>37646)    | 100 |
| <i>sspG</i> | -                      | -   | -                       | -   | -                      | -   |
| <i>sspH</i> | 30 (347509-<br>347687) | 96  | 1 (1230067-<br>1230246) | 100 | 35 (100187-<br>100366) | 100 |
| <i>sspI</i> | 30 (251604-<br>251816) | 96  | 1 (1339979-<br>1340191) | 100 | 15 (85281-<br>85493)   | 100 |
| <i>sspJ</i> | 5 (98676-<br>98688)    | 98  | 19 (110107-<br>110126)  | 100 | 13 (241415-<br>241428) | 100 |

|             |                             |     |                       |     |                        |     |
|-------------|-----------------------------|-----|-----------------------|-----|------------------------|-----|
|             | 98816)                      |     | 110247)               |     | 241555)                |     |
| <i>sspK</i> | 9 (22861-<br>23010)         | 99  | 3 (79798-<br>79947)   | 100 | 9 (79925-<br>80074)    | 100 |
| <i>sspL</i> | 30 (941705-<br>941851)      | 98  | 1 (646852-<br>646998) | 100 | 35 (617429-<br>617575) | 100 |
| <i>sspM</i> | NSH                         | -   | NSH                   | -   | NSH                    | -   |
| <i>sspN</i> | 6 (38718-<br>38861)         | 97  | 1 (350681-<br>350824) | 100 | 27 (350718-<br>350861) | 100 |
| <i>sspO</i> | 6 (34769-<br>34915)         | 95  | 1 (346730-<br>346876) | 99  | 27 (346767-<br>346913) | 100 |
| <i>sspP</i> | 6 (34581-<br>34727)         | 97  | 1 (346542-<br>346688) | 100 | 27 (346579-<br>346725) | 100 |
| <i>tlp</i>  | 6 (38887-<br>39123)         | 95  | 1 (350850-<br>351086) | 100 | 27 (350887-<br>351123) | 100 |
| <i>usd</i>  | 15 (496704-<br>496814)      | 100 | 25 (84981-<br>85091)  | 100 | 1 (231931-<br>232041)  | 100 |
| <i>ynzH</i> | 32 (296163-<br>296360)      | 98  | 8 (165393-<br>165587) | 98  | 48 (141943-<br>142140) | 100 |
| <i>yobW</i> | 30<br>(1074482-<br>1074895) | 95  | 1 (521360-<br>521773) | 100 | 27 (521401-<br>521814) | 100 |
| <i>yraE</i> | 31 (369869-<br>370069)      | 94  | 1 (273311-<br>273511) | 100 | 27 (273376-<br>273379) | 100 |
| <i>yraF</i> | -                           | -   | -                     | -   | -                      | -   |
| <i>yraG</i> | 4 (134680-<br>134680)       | 92  | 1 (898286-<br>898286) | 100 | 13 (130086-<br>130086) | 100 |

|             |         |   |         |   |         |   |
|-------------|---------|---|---------|---|---------|---|
|             | 134946) |   | 898552) |   | 130352) |   |
| <i>ytaA</i> | -       | - | -       | - | -       | - |

245 <sup>1</sup>If no homologous region is found for any amino acid sequence or gene by using the  
246 sequence from *B. subtilis*, the corresponding amino acid or gene sequence was obtained from  
247 *B. licheniformis* ATCC 14580 (NC\_006322.1). The colour codes are same as that used in the  
248 above table. <sup>2</sup>These genes, when extracted from *B. subtilis* genome, showed no significant  
249 homology in table S7A. Rows with '-' in all boxes means genes were not found in *B.*  
250 *licheniformis* ATCC 14580 (NC\_006322.1) for further comparison with strains G-1, F1-1,  
251 and F2-1. <sup>3</sup>NSH means either no significant homology or a few raw reads (1-6) were mapped  
252 with the coverage depth of 1 with the genomic region of another strain possessing this gene.  
253 <sup>4</sup>Raw reads from the strain were aligned to the gene of another strain with significant coverage  
254 depth.

255

256

257

258

259

260

261

262

263

264 **Table S8A: The genes involved in germination in *B. subtilis* 168 and the regions of their**  
 265 **homologs in *B. licheniformis* strains G-1, F1-1, and F2-1**

| <i>B. subtilis</i><br>gene <sup>1</sup> | Contig, coordinates and % identity in strains of <i>B. licheniformis</i> where the homologous sequence is found |            |                        |            |                        |            |
|-----------------------------------------|-----------------------------------------------------------------------------------------------------------------|------------|------------------------|------------|------------------------|------------|
|                                         | G-1                                                                                                             |            | F1-1                   |            | F2-1                   |            |
|                                         | Contig and coordinates                                                                                          | % identity | Contig and coordinates | % identity | Contig and coordinates | % identity |
| <i>gerAA</i>                            | 8 (168229-169590)                                                                                               | 38         | 17 (153976-155355)     | 38         | 12 (153939-155318)     | 38         |
|                                         | 5(58709-60088)                                                                                                  | 67         | 19 (72571-73950)       | 68         | 13 (203879-205258)     | 68         |
|                                         | 30 (1091279-1092577)                                                                                            | 44         | -                      | -          | 27 (503686-504858)     | 46         |
|                                         | 32 (202040-203296)                                                                                              | 34         | -                      | -          | -                      | -          |
| <i>gerAB</i>                            | 5 (60120-61139)                                                                                                 | 61         | 19 (73982-75001)       | 61         | 13 (205290-206309)     | 61         |
|                                         | 30 (1092684-1093676)                                                                                            | 39         | 1 (502546-503538)      | 39         | 27 (502587-503579)     | 40         |
|                                         | 30 (1093820-1094812)                                                                                            | 35         | 1 (499093-500088)      | 35         | 27 (499136-500131)     | 35         |
|                                         | 30 (1096140-1097018)                                                                                            | 39         | -                      | -          | -                      | -          |
| <i>gerAC</i>                            | 5 (61265-62329)                                                                                                 | 47         | 19 (75127-76191)       | 47         | 13 (206435-207499)     | 47         |

|              |                      |    |                    |    |                    |    |
|--------------|----------------------|----|--------------------|----|--------------------|----|
| <i>gerBA</i> | 5 (58721-60094)      | 43 | 19 (72775-73956)   | 48 | 13 (203891-205264) | 43 |
|              | 8 (168169-169614)    | 38 | 17 (153916-155361) | 37 | 12 (153879-155324) | 37 |
|              | 30 (1091171-1092637) | 42 | -                  | -  | 27 (503626-505083) | 42 |
|              | 32 (202031-203326)   | 34 | -                  | -  | -                  | -  |
| <i>gerBB</i> | 30 (1093802-1094881) | 34 | 1 (501347-502426)  | 34 | 27 (501390-502469) | 34 |
|              | 30 (1092672-1093676) | 35 | 1 (499027-500106)  | 34 | 27 (499070-500149) | 34 |
|              | 30 (1096122-1097120) | 34 | 1 (502546-503556)  | 34 | 27 (502587-503597) | 34 |
|              | 5 (60129-61205)      | 33 | 19 (73991-75067)   | 33 | 13 (205299-206375) | 32 |
| <i>gerBC</i> | 5 (61268-62320)      | 33 | 19 (75130-76182)   | 32 | 13 (206438-207490) | 33 |
|              | 30 (1094943-1096073) | 29 | -                  | -  | -                  | -  |
| <i>gerD</i>  | 13 (78651-79199)     | 74 | 10 (1884-2432)     | 74 | 7 (1880-2428)      | 73 |
| <i>gerKA</i> | 8 (168091-169725)    | 61 | 17 (153838-155472) | 62 | 12 (153801-155435) | 62 |
|              | 5 (58835-)           | 40 | 19 (72697-)        | 41 | 13 (204005-)       | 41 |



|              |                        |    |                         |    |                        |    |
|--------------|------------------------|----|-------------------------|----|------------------------|----|
|              | 60133)                 |    | 73995)                  |    | 205303)                |    |
|              | 32 (202049-<br>203365) | 35 | -                       | -  | 27 (503626-<br>505065) | 41 |
| <i>gerKB</i> | 8 (165828-<br>166850)  | 59 | 17 (151575-<br>152597)  | 59 | 12 (151538-<br>152560) | 59 |
| <i>gerKC</i> | 8 (166908-<br>168044)  | 52 | 17 (152655-<br>153791)  | 52 | 12 (152618-<br>153791) | 52 |
| <i>gerM</i>  | 30 (281909-<br>283015) | 72 | 1 (1305394-<br>1306500) | 74 | 35 (24711-<br>25817)   | 74 |
| <i>gerPA</i> | NSH <sup>2</sup>       | -  | NSH                     | -  | NSH                    | -  |
| <i>gerPB</i> | 32 (221414-<br>221641) | 67 | 8 (239679-<br>239909)   | 68 | 48 (218619-<br>218843) | 68 |
| <i>gerPC</i> | 32 (221684-<br>222283) | 63 | 8 (239044-<br>239622)   | 62 | 48 (217984-<br>218562) | 62 |
| <i>gerPD</i> | 32 (222289-<br>222462) | 74 | 8 (238865-<br>239038)   | 74 | 48 (217805-<br>217978) | 74 |
| <i>gerPE</i> | NSH                    | -  | NSH                     | -  | NSH                    | -  |
| <i>gerPF</i> | NSH                    | -  | NSH                     | -  | NSH                    | -  |
| <i>gpr</i>   | 30 (532200-<br>533303) | 76 | 1 (1076662-<br>1077765) | 76 | 35 (261317-<br>262420) | 77 |
| <i>sleB</i>  | 30 (857507-<br>858380) | 71 | 1 (730227-<br>731100)   | 71 | 35 (533241-<br>534203) | 70 |
| <i>yfkQ</i>  | 5 (168139-<br>169572)  | 45 | 17 (153895-<br>155319)  | 45 | 12 (153858-<br>155282) | 45 |

|             |                      |    |                     |    |                    |    |
|-------------|----------------------|----|---------------------|----|--------------------|----|
|             | 30 (1091228-1092652) | 43 | 1 (503570-504994)   | 42 | 27 (503611-505035) | 42 |
|             | 5 (58784-60148)      | 38 | 19 (72646-74010)    | 39 | 13 (203954-205318) | 39 |
|             | 32 (201986-203368)   | 31 | 1 (1002428-1003711) | 31 | -                  | -  |
| <i>yfkR</i> | 8 (166920-168044)    | 23 | 17 (152724-153791)  | 23 | 12 (152687-153754) | 23 |
| <i>yfkT</i> | NSH                  | -  | NSH                 | -  | NSH                | -  |
| <i>ykvT</i> | 31 (8565-9170)       | 51 | 8 (575510-576118)   | 51 | 48 (558757-559365) | 51 |
| <i>yndD</i> | 30 (1091072-1092634) | 64 | 1 (503588-505150)   | 63 | 27 (503629-505191) | 63 |
|             | 8 (168172-169605)    | 43 | 17 (153919-155352)  | 42 | 12 (153882-155315) | 42 |
|             | 5 (58658-60091)      | 42 | 19 (72520-73953)    | 42 | 13 (203828-205261) | 41 |
|             | 32 (202244-203356)   | 35 | 1 (1002398-1003822) | 31 | -                  | -  |
| <i>yndE</i> | 30 (1092720-1093751) | 57 | 1 (502471-503502)   | 56 | 27 (502512-503543) | 57 |
|             | 30 (1093802-1094881) | 54 | 1 (501347-502372)   | 56 | 27 (501390-502469) | 55 |
|             | 30 (1096176-1097135) | 58 | 1 (499027-500052)   | 60 | 27 (499070-500095) | 60 |

|             |                      |    |                   |    |                    |    |
|-------------|----------------------|----|-------------------|----|--------------------|----|
|             | 5 (60186-61205)      | 36 | 19 (74048-75067)  | 36 | 13 (205356-206375) | 36 |
| <i>yndF</i> | 30 (1094943-1096079) | 55 | 1 (500149-501285) | 55 | 27 (500192-501328) | 55 |
|             | -                    | -  | 1 (550263-551429) | 51 | 27 (550304-551470) | 51 |

266 <sup>1</sup>Homology for the proteins encoded by these genes were first searched with TBLASTN  
267 using BLOSUM62 matrix in the contigs of three target strains, and if the region of significant  
268 homology be not achieved using this matrix, BLOSUM45 matrix was used. If the protein  
269 sequences did not show homology, discontinuous megablast with corresponding gene  
270 sequences as queries were used (homologous regions found in such a way are shown green).

271 <sup>2</sup>NSH means ‘no significant homology’. The contigs and coordinates of genes for which  
272 query coverage was 95% or less are coloured brown. The percentage identity in black and  
273 brown fonts represents amino acid identity and that in the green represents nucleotide  
274 identity.

275

276

277

278

279

280

281

282 **Table S8B: The genes in *B. licheniformis* ATCC 14580 and the regions of their homologs**  
 283 **in *B. licheniformis* strains G-1, F1-1, and F2-1<sup>1</sup>**

| <i>B. licheniformis</i><br>ATCC 14580<br>gene <sup>2</sup> | Contig and coordinates in strains of <i>B. licheniformis</i> where the homologous sequence is found |            |                        |            |                        |            |
|------------------------------------------------------------|-----------------------------------------------------------------------------------------------------|------------|------------------------|------------|------------------------|------------|
|                                                            | G-1                                                                                                 |            | F1-1                   |            | F2-1                   |            |
|                                                            | Contig and coordinates                                                                              | % identity | Contig and coordinates | % identity | Contig and coordinates | % identity |
| <i>gerPA</i>                                               | 32 (221180-221400)                                                                                  | 94         | 8 (239915-240136)      | 100        | 48 (218855-219076)     | 100        |
| <i>gerPD</i>                                               | 32 (222289-222468)                                                                                  | 88         | 8 (238859-239038)      | 88         | 48 (217799-217978)     | 88         |
| <i>gerPE</i>                                               | 32 (222472-222850)                                                                                  | 79         | 8 (238477-238855)      | 79         | 48 (217417-217795)     | 79         |
| <i>gerPF</i>                                               | 32 (222907-223125)                                                                                  | 98         | 8 (238202-238420)      | 98         | 48 (217142-217360)     | 99         |
| <i>yfkT</i>                                                | -                                                                                                   | -          | -                      | -          | -                      | -          |

284 <sup>1</sup>If no homologous region is found for any amino acid sequence or gene by using the  
 285 sequence from *B. subtilis*, the corresponding amino acid or gene sequence was obtained from  
 286 *B. licheniformis* ATCC 14580 (NC\_006322.1). The method of homology search and colour  
 287 codes is same as that used in table S8A. <sup>2</sup>These genes, when extracted from *B. subtilis*  
 288 genome, showed no significant homology in table S8A. Rows with ‘-’ in all boxes means  
 289 genes were not found in *B. licheniformis* ATCC 14580 (NC\_006322.1) for further  
 290 comparison with strains G-1, F1-1, and F2-1.

291

292 **Table S9: Homology search results for biofilm related genes in *Bacillus licheniformis***  
 293 **strains G-1, F2-1, and F1-1<sup>1</sup>**

| <i>B. licheniformis</i><br>ATCC 14580<br>gene | Contig, coordinates and % identity in strains of <i>B. licheniformis</i> where the homologous sequence is found |            |                        |            |                        |            |
|-----------------------------------------------|-----------------------------------------------------------------------------------------------------------------|------------|------------------------|------------|------------------------|------------|
|                                               | G-1                                                                                                             |            | F1-1                   | F2-1       |                        |            |
|                                               | Contig and coordinates                                                                                          | % identity | Contig and coordinates | % identity | Contig and coordinates | % identity |
| <i>epsA</i>                                   | 15 (693863 to 694612)                                                                                           | 98         | 25 (263311 to 264060)  | 100        | 1 (52970 to 53719)     | 100        |
| <i>epsB</i>                                   | 15 (694596 to 695294)                                                                                           | 97         | 25 (264044 to 264742)  | 99         | 1 (52288 to 52986)     | 99         |
| <i>epsC</i>                                   | 15 (695557 to 697371)                                                                                           | 98         | 25 (265006 to 266820)  | 99         | 1 (50210 to 52024)     | 99         |
| <i>epsD</i>                                   | 15 (697385 to 698530)                                                                                           | 97         | 25 (266834 to 267979)  | 100        | 1 (49051 to 50196)     | 100        |
| <i>epsE</i>                                   | 15 (698530 to 699369)                                                                                           | 96         | 25 (267979 to 268818)  | 100        | 1 (48212 to 49051)     | 100        |
| <i>epsF</i>                                   | 15 (699365 to 700522)                                                                                           | 96         | 25 (268814 to 269971)  | 100        | 1 (47059 to 48216)     | 100        |
| <i>epsG</i>                                   | 15 (700530 to 701630)                                                                                           | 98         | 25 (269979 to 271079)  | 100        | 1 (45951 to 47051)     | 100        |
| <i>epsH</i>                                   | 15 (701678 to 702706)                                                                                           | 96         | 25 (271142 to 272170)  | 99         | 1 (44860 to 45888)     | 99         |
| <i>epsI</i>                                   | 15 (702721 to 703797)                                                                                           | 95         | 25 (272185 to 273261)  | 100        | 1 (43769 to 44845)     | 99         |

|             |                       |    |                       |     |                       |     |
|-------------|-----------------------|----|-----------------------|-----|-----------------------|-----|
| <i>epsJ</i> | 15 (703797 to 704813) | 97 | 25 (273261 to 274277) | 100 | 1 (42753 to 43769)    | 99  |
| <i>epsK</i> | 15 (704822 to 706351) | 96 | 25 (274286 to 275815) | 99  | 1 (41215 to 42744)    | 99  |
| <i>epsL</i> | 15 (706390 to 706989) | 99 | 25 (275854 to 276453) | 99  | 1 (40577 to 41176)    | 99  |
| <i>epsM</i> | 15 (706992 to 707615) | 96 | 25 (276456 to 277079) | 100 | 1 (39951 to 40574)    | 99  |
| <i>epsN</i> | 15 (707644 to 708786) | 98 | 25 (277106 to 278248) | 100 | 1 (38782 to 39924)    | 99  |
| <i>epsO</i> | 15 (708800 to 709774) | 94 | 25 (278262 to 279236) | 100 | 1 (37794 to 38768)    | 100 |
| <i>yqxM</i> | 30 (626174 to 626899) | 92 | 1 (986445 to 987170)  | 99  | 35 (351908 to 352633) | 99  |
| <i>sipW</i> | 30 (626899 to 627480) | 96 | 1 (985864 to 986445)  | 100 | 35 (352633 to 353214) | 100 |
| <i>tasA</i> | 30 (627556 to 628347) | 99 | 1 (984996 to 985787)  | 100 | 35 (353291 to 354082) | 100 |
| <i>sinI</i> | 30 (628824 to 629000) | 96 | 1 (984343 to 984519)  | 100 | 35 (354559 to 354735) | 100 |
| <i>sinR</i> | 30 (628458 to 628796) | 99 | 1 (984547 to 984885)  | 99  | 35 (354193 to 354531) | 99  |

294 <sup>1</sup>Query sequences for comparison were extracted from *B. licheniformis* ATCC 14580.

295 Homology for the proteins encoded by these genes were first searched with TBLASTN using

296 BLOSUM62 matrix in the contigs of three target strains, and if the region of significant

297 homology be not achieved using this matrix, BLOSUM45 matrix was used. If the protein  
298 sequences did not show homology, discontinuous megablast with corresponding gene  
299 sequences as queries were used (homologous regions found in such a way are shown green).  
300 The percentage identity in normal black font represents amino acid identity and that in the  
301 green represents nucleotide identity.

302

303

304

305

306

307

308

309

310

311

312

313

314

315

316 **Table S10A: The genes involved in adaptation to atypical conditions in *B. subtilis* 168**  
 317 **and the regions of their homologs in *B. licheniformis* strains G-1, F1-1, and F2-1**

| <i>B. subtilis</i><br>gene <sup>1</sup> | Contig, coordinates and % identity in strains of <i>B. licheniformis</i> where the homologous sequence is found |            |                        |            |                        |            |
|-----------------------------------------|-----------------------------------------------------------------------------------------------------------------|------------|------------------------|------------|------------------------|------------|
|                                         | G-1                                                                                                             |            | F1-1                   |            | F2-1                   |            |
|                                         | Contig and coordinates                                                                                          | % identity | Contig and coordinates | % identity | Contig and coordinates | % identity |
| <i>bsaA</i>                             | 30 (950051-950524)                                                                                              | 70         | 1 (638173-638646)      | 70         | 35 (625781-626254)     | 70         |
| <i>clpC</i>                             | 11 (20350-22269)                                                                                                | 54         | 8 (561977-563893)      | 54         | 48 (501461-503377)     | 54         |
|                                         | 13 (2381-4810)                                                                                                  | 96         | 10 (53383-55812)       | 96         | 7 (53379-55808)        | 96         |
| <i>clpE</i>                             | 11 (20359-22443)                                                                                                | 80         | 8 (561983-564067)      | 81         | 48 (501467-503551)     | 81         |
|                                         | 13 (2834-4765)                                                                                                  | 54         | 10 (53428-55359)       | 54         | 7 (53424-55355)        | 54         |
| <i>clpP</i>                             | 15 (676774-677358)                                                                                              | 93         | 25 (246542-247132)     | 92         | 1 (69897-70487)        | 92         |
|                                         | 15 (484379-484969)                                                                                              | 63         | 25 (74336-74911)       | 65         | 1 (242111-242686)      | 65         |
| <i>clpQ</i>                             | 31 (248268-248810)                                                                                              | 90         | 1 (154449-154991)      | 90         | 27 (154441-154983)     | 90         |
| <i>clpX</i>                             | 30 (301173-302432)                                                                                              | 91         | 1 (1275077-1276336)    | 91         | 35 (54056-55315)       | 91         |



|             |                    |    |                     |    |                    |    |
|-------------|--------------------|----|---------------------|----|--------------------|----|
| <i>clpY</i> | 31 (248830-250230) | 88 | 1 (155011-156411)   | 89 | 27 (155003-156403) | 89 |
| <i>csbB</i> | 9 (20750-21727)    | 77 | 3 (81053-82006)     | 78 | 9 (81180-82133)    | 78 |
| <i>cspB</i> | 32 (431021-431216) | 95 | 8 (32580-32775)     | 95 | 48 (6512-6707)     | 95 |
| <i>cspC</i> | 8 (41877-42074)    | 96 | 17 (33929-34126)    | 95 | 12 (33934-34131)   | 95 |
| <i>cspD</i> | 30 (944646-944842) | 91 | 1 (643837-644033)   | 91 | 35 (620394-620590) | 91 |
| <i>cstA</i> | 30 (249776-251569) | 89 | 1 (1340226-1342019) | 90 | 15 (83453-85246)   | 90 |
| <i>ctc</i>  | 2 (31296-31835)    | 68 | 14 (23892-24431)    | 68 | 4 (31270-31809)    | 68 |
| <i>degQ</i> | NSH <sup>2</sup>   | -  | NSH                 | -  | NSH                | -  |
| <i>degR</i> | NSH                | -  | NSH                 | -  | NSH                | -  |
| <i>dnaJ</i> | 30 (541971-543095) | 90 | 1 (1066869-1067993) | 89 | 35 (271089-272213) | 89 |
| <i>dps</i>  | 30 (64869-65303)   | 78 | 28 (28515-28949)    | 78 | 49 (30171-30605)   | 78 |
| <i>gbsA</i> | 6 (99065-100465)   | 32 | 1 (407252-408652)   | 32 | 27 (407294-408694) | 32 |
|             | 4 (12334-13803)    | 87 | 15 (12370-13839)    | 87 | 13 (12366-13835)   | 87 |
|             | -                  | -  | 17 (128370-         | 34 | 12 (128308-        | 33 |

|             |                          |    |                         |    |                        |    |
|-------------|--------------------------|----|-------------------------|----|------------------------|----|
|             |                          |    | 129725)                 |    | 129663)                |    |
|             | 30 (1019771-<br>1021195) | 44 | 5 (58382-<br>59788)     | 44 | 27 (567540-<br>568964) | 44 |
|             | 15 (378469-<br>379875)   | 44 | 1 (567499-<br>568923)   | 44 | 6 (30336-<br>31742)    | 44 |
|             | 19 (138022-<br>139440)   | 37 | 4 (125627-<br>127045)   | 38 | 2 (125603-<br>127021)  | 38 |
|             | 12 (114419-<br>115804)   | 36 | 30 (142898-<br>144283)  | 36 | 29 (131426-<br>132811) | 36 |
|             | -                        | -  | 16 (8067-<br>9470)      | 33 | 8 (49522-<br>50925)    | 33 |
|             | 8 (142587-<br>143942)    | 34 | 4 (33815-<br>35200)     | 34 | 2 (33796-<br>35181)    | 34 |
| <i>gbsB</i> | 4 (11108-<br>12316)      | 92 | 15 (11144-<br>12352)    | 91 | 13 (11140-<br>12348)   | 91 |
| <i>grpE</i> | 30 (539465-<br>539923)   | 78 | 1 (1070041-<br>1070499) | 78 | 35 (268583-<br>269041) | 78 |
| <i>gsiB</i> | 8 (81443-<br>81811)      | 92 | 17 (69156-<br>69524)    | 89 | 12 (69107-<br>69460)   | 90 |
| <i>gspA</i> | 15 (309949-<br>310776)   | 73 | 6 (9666-<br>10493)      | 74 | 6 (99709-<br>100536)   | 74 |
| <i>hit</i>  | 32 (314106-<br>314516)   | 80 | 8 (147237-<br>147647)   | 80 | 48 (123790-<br>124200) | 80 |
| <i>htpG</i> | 15 (123646-<br>125523)   | 84 | 16 (14338-<br>16215)    | 84 | 8 (42778-<br>44655)    | 84 |

|             |                    |    |                     |    |                    |    |
|-------------|--------------------|----|---------------------|----|--------------------|----|
| <i>htrA</i> | 5 (52032-52973)    | 62 | 19 (65894-66835)    | 62 | 13 (197202-198143) | 62 |
|             | 35 (48808-50100)   | 61 | 8 (453423-454709)   | 61 | 48 (433141-434427) | 61 |
|             | 15 (51829-52680)   | 49 | 9 (6583-7434)       | 48 | 11 (6581-7432)     | 48 |
| <i>lonA</i> | 30 (304493-306814) | 88 | 1 (1270693-1273014) | 89 | 35 (57378-59699)   | 88 |
| <i>lonB</i> | 30 (302621-304273) | 86 | 1 (1273236-1274888) | 86 | 35 (55504-57156)   | 86 |
| <i>mcsA</i> | 13 (739-1290)      | 73 | 10 (56903-57454)    | 73 | 7 (56899-57450)    | 73 |
| <i>mcsB</i> | 13 (1293-2381)     | 87 | 10 (55812-56900)    | 87 | 7 (55808-56896)    | 87 |
| <i>mrgA</i> | 5 (51253-51708)    | 64 | 19 (65376-65831)    | 63 | 13 (196684-197139) | 63 |
| <i>pspA</i> | 33 (15301-15936)   | 72 | 30 (26461-27096)    | 72 | 29 (14813-15448)   | 72 |
| <i>rsbP</i> | NSH                | -  | NSH                 | -  | NSH                | -  |
| <i>rsbQ</i> | 4 (61195-61935)    | 26 | 1 (968200-968940)   | 26 | 13 (59672-60412)   | 26 |
| <i>rsbR</i> | 8 (61457-62281)    | 69 | 17 (49304-50128)    | 70 | 12 (49300-50124)   | 70 |
| <i>rsbS</i> | 8 (61088-61441)    | 76 | 17 (48935-49288)    | 77 | 12 (48931-49284)   | 77 |

|             |                    |    |                   |    |                    |    |
|-------------|--------------------|----|-------------------|----|--------------------|----|
| <i>rsbT</i> | 8 (60684-61082)    | 85 | 17 (48531-48929)  | 85 | 12 (48527-48925)   | 85 |
| <i>rsbU</i> | 8 (59666-60670)    | 83 | 17 (47513-48517)  | 83 | 12 (47509-48513)   | 83 |
| <i>rsbV</i> | NSH                | -  | NSH               | -  | NSH                | -  |
| <i>rsbW</i> | 8 (58799-59278)    | 82 | 17 (46643-47125)  | 80 | 12 (46639-47121)   | 80 |
| <i>rsbX</i> | 8 (57449-58042)    | 59 | 17 (45293-45886)  | 61 | 12 (45289-45882)   | 61 |
| <i>yacC</i> | 2 (9794-10657)     | 85 | 14 (45059-45922)  | 84 | 4 (9778-10641)     | 84 |
| <i>ydaG</i> | 8 (104248-104667)  | 76 | 17 (90061-90480)  | 74 | 12 (89989-90408)   | 74 |
| <i>yetI</i> | NSH                | -  | NSH               | -  | NSH                | -  |
| <i>yezB</i> | 30 (620896-621147) | 49 | 1 (992187-992441) | 49 | 35 (346637-346891) | 49 |
| <i>yfiQ</i> | 15 (112547-113632) | 65 | 16 (26243-27328)  | 65 | 8 (31667-32752)    | 65 |
| <i>ykoB</i> | 30 (620356-621120) | 35 | 1 (992217-992981) | 36 | 35 (346097-346861) | 36 |
|             | 8 (61505-62275)    | 32 | 17 (49352-50122)  | 31 | 12 (49348-50118)   | 31 |
| <i>ykrL</i> | 35 (1609-2499)     | 80 | 8 (539444-540334) | 81 | 48 (478928-479818) | 81 |
| <i>yloA</i> | 31 (196669-        | 78 | 1 (102866-        | 77 | 27 (102853-        | 77 |

|             |                          |    |                        |    |                        |    |
|-------------|--------------------------|----|------------------------|----|------------------------|----|
|             | 198363)                  |    | 104581)                |    | 104586)                |    |
| <i>yloU</i> | 31 (216713-<br>217072)   | 88 | 1 (122909-<br>123268)  | 89 | 27 (122901-<br>123260) | 89 |
| <i>ynbA</i> | 31 (423897-<br>424811)   | 87 | 1 (306326-<br>307240)  | 87 | 27 (306390-<br>307304) | 87 |
| <i>ynzF</i> | NSH                      | -  | NSH                    | -  | NSH                    | -  |
| <i>yocK</i> | NSH                      | -  | NSH                    | -  | NSH                    | -  |
| <i>yocM</i> | NSH                      | -  | NSH                    | -  | NSH                    | -  |
| <i>yodU</i> | 30 (1069447-<br>1069833) | 52 | 1 (526427-<br>526822)  | 51 | 27 (526468-<br>526863) | 51 |
| <i>yojH</i> | 30 (620344-<br>621126)   | 36 | 1 (992211-<br>992993)  | 36 | 35 (346085-<br>346867) | 36 |
| <i>yokG</i> | NSH                      | -  | NSH                    | -  | NSH                    | -  |
| <i>ypjQ</i> | 30 (956596-<br>957087)   | 87 | 1 (631621-<br>632112)  | 87 | 35 (632315-<br>632806) | 87 |
| <i>ypqP</i> | 15 (696763-<br>697203)   | 42 | 25 (266212-<br>266652) | 42 | 1 (50378-<br>50818)    | 42 |
|             | 30 (1069822-<br>1070421) | 37 | 1 (525839-<br>526438)  | 36 | 27 (525880-<br>526479) | 36 |
| <i>yqhA</i> | 30 (620509-<br>621147)   | 57 | 1 (992190-<br>992798)  | 60 | 35 (346280-<br>340888) | 60 |
| <i>yraA</i> | 9 (84283-<br>84792)      | 61 | 3 (18717-<br>19226)    | 61 | 9 (18843-<br>19352)    | 61 |
| <i>ytvA</i> | 5 (52026-                | 63 | Raw reads              | -  | Raw reads              | -  |

|             |                        |    |                        |    |                        |    |
|-------------|------------------------|----|------------------------|----|------------------------|----|
|             | 53384)                 |    | present                |    | present                |    |
|             | 35 (48856-<br>50100)   | 56 | NSH <sup>3</sup>       | -  | NSH                    | -  |
|             | 15 (51829-<br>52674)   | 49 | NSH                    | -  | NSH                    | -  |
| <i>ytxG</i> | 30 (143726-<br>144132) | 71 | 28 (106739-<br>107145) | 72 | 49 (108395-<br>108801) | 72 |
| <i>ytxH</i> | NSH                    | -  | NSH                    | -  | NSH                    | -  |
| <i>ytxJ</i> | NSH                    | -  | NSH                    | -  | NSH                    | -  |
| <i>yutG</i> | 4 (143647-<br>144090)  | 71 | 19 (7935-<br>8378)     | 70 | 13 (139243-<br>139686) | 70 |
| <i>yveK</i> | NSH                    | -  | NSH                    | -  | NSH                    | -  |
| <i>yveL</i> | 15 (694605-<br>695219) | 62 | 25 (264059-<br>264667) | 62 | 1 (52363-<br>52971)    | 62 |
| <i>yveM</i> | 15 (695581-<br>697353) | 68 | 25 (265030-<br>266802) | 68 | 1 (50228-<br>52000)    | 68 |
| <i>yveN</i> | 15 (697385-<br>698524) | 66 | 25 (266834-<br>267973) | 65 | 1 (49057-<br>50196)    | 65 |
| <i>yveQ</i> | 15 (700530-<br>710630) | 72 | 25 (269979-<br>271079) | 72 | 1 (45951-<br>47051)    | 72 |
| <i>yveR</i> | 15 (701678-<br>702703) | 56 | 25 (271142-<br>272167) | 55 | 1 (44863-<br>45888)    | 56 |
| <i>yvfE</i> | 15 (707653-<br>708765) | 72 | 25 (277115-<br>278227) | 72 | 1 (38803-<br>39915)    | 72 |

|             |                    |    |                    |    |                    |    |
|-------------|--------------------|----|--------------------|----|--------------------|----|
| <i>yvtA</i> | 5 (52026-53384)    | 63 | 19 (65888-67246)   | 63 | 13 (197196-198554) | 63 |
|             | 15 (51829-52674)   | 49 | 9 (6583-7428)      | 50 | 11 (6581-7426)     | 50 |
|             | 35 (48856-50100)   | 27 | 8 (453423-454661)  | 56 | 48 (433141-434379) | 56 |
| <i>ywqC</i> | NSH                | -  | NSH                | -  | NSH                | -  |
| <i>ywqD</i> | 15 (694605-695285) | 58 | 25 (264053-264733) | 57 | 1 (52297-52977)    | 57 |
| <i>ywqE</i> | 15 (519146-519868) | 56 | 25 (103989-104711) | 56 | 1 (212311-213033)  | 56 |
| <i>ywsC</i> | 15 (535488-536666) | 90 | 25 (118669-119847) | 90 | 1 (197176-198354)  | 90 |
| <i>ywtA</i> | 15 (536685-537131) | 90 | 25 (119866-120312) | 90 | 1 (196711-197157)  | 90 |
| <i>ywtB</i> | 15 (537154-538296) | 67 | 25 (120335-121474) | 67 | 1 (195546-196688)  | 67 |
| <i>yxkI</i> | NSH                | -  | NSH                | -  | NSH                | -  |
| <i>yyxA</i> | 15 (51478-52689)   | 66 | 9 (6232-7443)      | 67 | 11 (6230-7441)     | 67 |
|             | 5 (52023-53192)    | 44 | 19 (65885-67054)   | 44 | 13 (197193-198362) | 44 |
|             | 35 (48796-50076)   | 41 | 8 (453447-454721)  | 42 | 48 (433165-434439) | 42 |

318 <sup>1</sup>Homology for the proteins encoded by these genes were first searched with TBLASTN  
319 using BLOSUM62 matrix in the contigs of three target strains, and if the region of significant  
320 homology was not achieved using this matrix, BLOSUM45 matrix was used. If the protein  
321 sequences did not show homology, discontinuous megablast with corresponding gene  
322 sequences as queries were used (homologous regions found in such a way are shown green).  
323 <sup>2</sup>NSH means ‘no significant homology’. The contigs and coordinates of genes for which  
324 query coverage was 95% or less are coloured brown. The percentage identity in normal black  
325 and brown fonts represents amino acid identity and that in green represents nucleotide  
326 identity. <sup>3</sup>The gene was observed in strains F1-1 and F2-1 only after mapping their raw reads  
327 with assembled contigs of strain G-1.

328

329

330

331

332

333

334

335

336

337



338 **Table S10B: The genes involved in adaptation to atypical conditions in *B. licheniformis***  
339 **ATCC 14580 and the regions of their homologs in *B. licheniformis* strains G-1, F1-1,**  
340 **and F2-11**

| <i>B. licheniformis</i><br>ATCC 14580<br>gene <sup>2</sup> | Contig and coordinates in strains of <i>B. licheniformis</i> where the homologous sequence is found |            |                        |            |                        |            |
|------------------------------------------------------------|-----------------------------------------------------------------------------------------------------|------------|------------------------|------------|------------------------|------------|
|                                                            | G-1                                                                                                 |            | F1-1                   |            | F2-1                   |            |
|                                                            | Contig and coordinates                                                                              | % identity | Contig and coordinates | % identity | Contig and coordinates | % identity |
| <i>degQ</i>                                                | 4 (87449-87589)                                                                                     | 100        | 1 (942538-942678)      | 99         | 13 (85955-86095)       | 99         |
| <i>degR</i>                                                | 30 (944405-944587)                                                                                  | 98         | 1 (644093-644275)      | 99         | 35 (620152-620334)     | 99         |
| <i>rsbP</i>                                                | -                                                                                                   | -          | -                      | -          | -                      | -          |
| <i>rsbV</i>                                                | 8 (59281-59604)                                                                                     | 97         | 17 (47128-47451)       | 99         | 12 (47124-47447)       | 99         |
| <i>yetI</i>                                                | -                                                                                                   | -          | -                      | -          | -                      | -          |
| <i>ynzF</i>                                                | -                                                                                                   | -          | -                      | -          | -                      | -          |
| <i>yocK</i>                                                | 30 (1022620-1023105)                                                                                | 68         | 1 (565623-566108)      | 96         | 27 (565664-566149)     | 96         |
| <i>yocM</i>                                                | -                                                                                                   | -          | -                      | -          | -                      | -          |
| <i>yokG</i>                                                | -                                                                                                   | -          | -                      | -          | -                      | -          |
| <i>ytxH</i>                                                | 30 (144152-144568)                                                                                  | 95         | 28 (107165-107581)     | 99         | 49 (108821-109237)     | 100        |
| <i>ytxJ</i>                                                | 30 (144589-                                                                                         | 96         | 28 (107602-            | 99         | 49 (109258-            | 99         |

|             |                        |    |                        |     |                       |     |
|-------------|------------------------|----|------------------------|-----|-----------------------|-----|
|             | 144912)                |    | 107925)                |     | 109581)               |     |
| <i>yveK</i> | 15 (693863-<br>694612) | 98 | 1 (263311-<br>264060)  | 100 | 1 (52970-<br>53719)   | 100 |
| <i>ywqC</i> | 15 (518397-<br>519113) | 93 | 25 (103240-<br>103959) | 99  | 1 (213063-<br>213782) | 100 |
| <i>yxkI</i> | -                      | -  | -                      | -   | -                     | -   |

341 <sup>1</sup>If no homologous region is found for any amino acid sequence or gene by using the  
342 sequence from *B. subtilis*, the corresponding amino acid or gene sequence was obtained from  
343 *B. licheniformis* ATCC 14580 (NC\_006322.1). The method of homology search and colour  
344 codes is same as that used in the above table. <sup>2</sup>These genes, when extracted from *B. subtilis*  
345 genome, showed no significant homology in table S10A. <sup>3</sup>NSH means ‘no significant  
346 homology’. Rows with ‘-’ in all boxes means genes were not found in *B. licheniformis* ATCC  
347 14580 (NC\_006322.1) for further comparison with strains G-1, F1-1, and F2-1.

348

349

350

351

352

353

354

355

356 **Table S11A. The genes involved in antibiotic production in *B. subtilis* 168 and the**  
 357 **regions of their homologs in *B. licheniformis* strains G-1, F2-1, and F1-1**

| <i>B. subtilis</i><br>gene <sup>1</sup> | Contig, coordinates and % identity in strains of <i>B. licheniformis</i> where the homologous sequence is found |            |                        |            |                        |            |
|-----------------------------------------|-----------------------------------------------------------------------------------------------------------------|------------|------------------------|------------|------------------------|------------|
|                                         | G-1                                                                                                             |            | F1-1                   |            | F2-1                   |            |
|                                         | Contig and coordinates                                                                                          | % identity | Contig and coordinates | % identity | Contig and coordinates | % identity |
| <i>acpK</i>                             | NSH <sup>2</sup>                                                                                                | -          | NSH                    | -          | NSH                    | -          |
| <i>alba</i>                             | NSH                                                                                                             | -          | NSH                    | -          | NSH                    | -          |
| <i>albB</i>                             | NSH                                                                                                             | -          | NSH                    | -          | NSH                    | -          |
| <i>albC</i>                             | NSH                                                                                                             | -          | NSH                    | -          | NSH                    | -          |
| <i>albD</i>                             | NSH                                                                                                             | -          | NSH                    | -          | NSH                    | -          |
| <i>albE</i>                             | NSH                                                                                                             | -          | NSH                    | -          | NSH                    | -          |
| <i>albF</i>                             | NSH                                                                                                             | -          | NSH                    | -          | NSH                    | -          |
| <i>albG</i>                             | NSH                                                                                                             | -          | NSH                    | -          | NSH                    | -          |
| <i>pksB</i>                             | NSH                                                                                                             | -          | NSH                    | -          | NSH                    | -          |
| <i>pksC</i>                             | NSH                                                                                                             | -          | NSH                    | -          | NSH                    | -          |
| <i>pksD</i>                             | NSH                                                                                                             | -          | NSH                    | -          | NSH                    | -          |
| <i>pksE</i>                             | NSH                                                                                                             | -          | NSH                    | -          | NSH                    | -          |
| <i>pksF</i>                             | NSH                                                                                                             | -          | NSH                    | -          | NSH                    | -          |
| <i>pksG</i>                             | NSH                                                                                                             | -          | NSH                    | -          | NSH                    | -          |
| <i>pksH</i>                             | NSH                                                                                                             | -          | NSH                    | -          | NSH                    | -          |
| <i>pksI</i>                             | NSH                                                                                                             | -          | NSH                    | -          | NSH                    | -          |
| <i>pksJ</i>                             | NSH                                                                                                             | -          | NSH                    | -          | NSH                    | -          |
| <i>pksL</i>                             | NSH                                                                                                             | -          | NSH                    | -          | NSH                    | -          |

|                          |                      |    |                      |    |                      |    |
|--------------------------|----------------------|----|----------------------|----|----------------------|----|
| <i>pksM</i>              | NSH                  | -  | NSH                  | -  | NSH                  | -  |
| <i>pksN</i>              | NSH                  | -  | NSH                  | -  | NSH                  | -  |
| <i>pksR</i>              | NSH                  | -  | NSH                  | -  | NSH                  | -  |
| <i>pnbA</i>              | 33 (17616-<br>19079) | 58 | 30 (23317-<br>24765) | 59 | 29 (11669-<br>13117) | 59 |
| <i>ppsA</i> <sup>3</sup> | 1                    |    | 4                    |    | 1                    |    |
|                          | 15                   |    | 11                   |    | 2                    |    |
|                          | 18                   |    | 17                   |    | 10                   |    |
|                          | 19                   |    | 25                   |    | 12                   |    |
|                          | 30                   |    |                      |    |                      |    |
| <i>ppsB</i>              | 1                    |    | 4                    |    | 1                    |    |
|                          | 15                   |    | 11                   |    | 2                    |    |
|                          | 18                   |    | 17                   |    | 10                   |    |
|                          | 19                   |    | 25                   |    | 12                   |    |
|                          | 30                   |    |                      |    |                      |    |
| <i>ppsC</i>              | 1                    |    | 4                    |    | 1                    |    |
|                          | 15                   |    | 11                   |    | 2                    |    |
|                          | 18                   |    | 17                   |    | 10                   |    |
|                          | 19                   |    | 25                   |    | 12                   |    |
|                          | 30                   |    |                      |    |                      |    |
| <i>ppsD</i>              | 1                    |    | 4                    |    | 1                    |    |
|                          | 15                   |    | 11                   |    | 2                    |    |
|                          | 18                   |    | 17                   |    | 10                   |    |
|                          | 19                   |    | 25                   |    | 12                   |    |

|                           |               |    |                        |    |            |    |
|---------------------------|---------------|----|------------------------|----|------------|----|
|                           | 30            |    |                        |    |            |    |
| <i>ppsE</i>               | 1             |    | 4                      |    | 1          |    |
|                           | 15            |    | 11                     |    | 2          |    |
|                           | 18            |    | 17                     |    | 10         |    |
|                           | 19            |    | 25                     |    | 12         |    |
|                           | 30            |    |                        |    |            |    |
| <i>sboA</i>               | NSH           | -  | NSH                    | -  | NSH        | -  |
| <i>sboX</i>               | NSH           | -  | NSH                    | -  | NSH        | -  |
| <i>sfp</i>                | NSH           | -  | NSH                    | -  | NSH        | -  |
| <i>srfAA</i> <sup>4</sup> | 1             |    | 4                      |    | 1          |    |
|                           | 15            |    | 11                     |    | 2          |    |
|                           | 18            |    | 17                     |    | 10         |    |
|                           | 19            |    | 25                     |    | 12         |    |
|                           | 30            |    |                        |    |            |    |
| <i>srfAB</i>              | 1             |    | 4                      |    | 1          |    |
|                           | 15            |    | 11                     |    | 2          |    |
|                           | 18            |    | 17                     |    | 10         |    |
|                           | 19            |    | 25                     |    | 12         |    |
|                           | 30            |    |                        |    |            |    |
| <i>srfAC</i>              | 1 (2566-6402) | 58 | 4                      |    | 1          |    |
|                           | 15            |    | 11                     |    | 2          |    |
|                           | 18            |    | 17 (204596-<br>208432) | 58 | 10         |    |
|                           | 19            |    | 25                     |    | 12(204567- | 58 |

|              |               |    |                    |    |                    |    |
|--------------|---------------|----|--------------------|----|--------------------|----|
|              |               |    |                    |    | 208403)            |    |
|              | 30            |    |                    |    |                    |    |
| <i>srfAD</i> | 1 (6418-7098) | 63 | 17 (203879-204580) | 63 | 12 (203850-204551) | 63 |
| <i>sunA</i>  | NSH           | -  | NSH                | -  | NSH                | -  |

358 <sup>1</sup>Homology for the proteins encoded by these genes were first searched with TBLASTN  
359 using BLOSUM62 matrix in the contigs of three target strains, and if the region of significant  
360 homology was not achieved using this matrix, BLOSUM45 matrix was used. If the protein  
361 sequences did not show homology, discontinuous megablast with corresponding gene  
362 sequences as queries were used (homologous regions found in such a way are shown green).  
363 <sup>2</sup>NSH means ‘no significant homology’. The contigs and coordinates of genes for which  
364 query coverage was 95% or less are coloured brown. The percentage identity represents  
365 amino acid identity. <sup>3, 4</sup> For *pps* and some *srf* genes, only the contig numbers are recorded in  
366 the table for clarity because they had too many matches, which might have been partial and  
367 overlapping, partial and non-overlapping or full length non-overlapping.

368

369

370

371

372

373

374

375 **Table S11B. The genes involved in antibiotic production in *B. licheniformis* ATCC**  
 376 **14580 and the regions of their homologs in *B. licheniformis* strains G-1, F2-1, and F1-1<sup>1</sup>**

| <i>B. licheniformis</i><br>ATCC<br>14580 gene <sup>2</sup> | Contig and coordinates in strains of <i>B. licheniformis</i> where the homologous sequence is found |            |                        |            |                        |            |
|------------------------------------------------------------|-----------------------------------------------------------------------------------------------------|------------|------------------------|------------|------------------------|------------|
|                                                            | G-1                                                                                                 |            | F1-1                   |            | F2-1                   |            |
|                                                            | Contig and coordinates                                                                              | % identity | Contig and coordinates | % identity | Contig and coordinates | % identity |
| <i>acpK</i>                                                | -                                                                                                   | -          | -                      | -          | -                      | -          |
| <i>alba</i>                                                | -                                                                                                   | -          | -                      | -          | -                      | -          |
| <i>albB</i>                                                | -                                                                                                   | -          | -                      | -          | -                      | -          |
| <i>albC</i>                                                | -                                                                                                   | -          | -                      | -          | -                      | -          |
| <i>albD</i>                                                | -                                                                                                   | -          | -                      | -          | -                      | -          |
| <i>albE</i>                                                | -                                                                                                   | -          | -                      | -          | -                      | -          |
| <i>albF</i>                                                | -                                                                                                   | -          | -                      | -          | -                      | -          |
| <i>albG</i>                                                | -                                                                                                   | -          | -                      | -          | -                      | -          |
| <i>pksB</i>                                                | -                                                                                                   | -          | -                      | -          | -                      | -          |
| <i>pksC</i>                                                | -                                                                                                   | -          | -                      | -          | -                      | -          |
| <i>pksD</i>                                                | -                                                                                                   | -          | -                      | -          | -                      | -          |
| <i>pksE</i>                                                | -                                                                                                   | -          | -                      | -          | -                      | -          |
| <i>pksF</i>                                                | -                                                                                                   | -          | -                      | -          | -                      | -          |
| <i>pksG</i>                                                | -                                                                                                   | -          | -                      | -          | -                      | -          |
| <i>pksH</i>                                                | -                                                                                                   | -          | -                      | -          | -                      | -          |
| <i>pksI</i>                                                | -                                                                                                   | -          | -                      | -          | -                      | -          |
| <i>pksJ</i>                                                | -                                                                                                   | -          | -                      | -          | -                      | -          |
| <i>pksL</i>                                                | -                                                                                                   | -          | -                      | -          | -                      | -          |

|              |                    |    |                        |     |                        |     |
|--------------|--------------------|----|------------------------|-----|------------------------|-----|
| <i>pksM</i>  | -                  | -  | -                      | -   | -                      | -   |
| <i>pksN</i>  | -                  | -  | -                      | -   | -                      | -   |
| <i>pksR</i>  | -                  | -  | -                      | -   | -                      | -   |
| <i>pnbA</i>  | -                  | -  | -                      | -   | -                      | -   |
| <i>ppsA</i>  | -                  | -  | -                      | -   | -                      | -   |
| <i>ppsB</i>  | -                  | -  | -                      | -   | -                      | -   |
| <i>ppsC</i>  | -                  | -  | -                      | -   | -                      | -   |
| <i>ppsD</i>  | -                  | -  | -                      | -   | -                      | -   |
| <i>ppsE</i>  | -                  | -  | -                      | -   | -                      | -   |
| <i>sboA</i>  | -                  | -  | -                      | -   | -                      | -   |
| <i>sboX</i>  | -                  | -  | -                      | -   | -                      | -   |
| <i>sfp</i>   | 1 (9618-<br>10295) | 96 | 17 (200705-<br>201382) | 100 | 12 (200676-<br>201353) | 100 |
| <i>srfAA</i> | -                  | -  | -                      | -   | -                      | -   |
| <i>srfAB</i> | -                  | -  | -                      | -   | -                      | -   |
| <i>srfAC</i> | -                  | -  | -                      | -   | -                      | -   |
| <i>srfAD</i> | -                  | -  | -                      | -   | -                      | -   |
| <i>sunA</i>  | -                  | -  | -                      | -   | -                      | -   |

377 <sup>1</sup>If no homologous region is found for any amino acid sequence or gene by using the  
378 sequence from *B. subtilis*, the corresponding amino acid or gene sequence was obtained from  
379 *B. licheniformis* ATCC 14580 (NC\_006322.1). The colour codes are same as that used in the  
380 above table. <sup>2</sup>These genes, when extracted from *B. subtilis* genome, showed no significant  
381 homology in table S11A. Rows with '-' in all boxes means genes were not found in *B.*  
382 *licheniformis* ATCC 14580 (NC\_006322.1) for further comparison with strains G-1, F1-1,  
383 and F2-1.



384 **Table S12A: The genes involved in detoxification in *B. subtilis* 168 and the regions of**  
 385 **their homologs in *B. licheniformis* strains G-1, F1-1, and F2-1**

| <i>B. subtilis</i><br>gene <sup>1</sup> | Contig, coordinates and % identity in strains of <i>B. licheniformis</i> where the homologous sequence is found |            |                        |            |                        |            |
|-----------------------------------------|-----------------------------------------------------------------------------------------------------------------|------------|------------------------|------------|------------------------|------------|
|                                         | G-1                                                                                                             |            | F1-1                   |            | F2-1                   |            |
|                                         | Contig and coordinates                                                                                          | % identity | Contig and coordinates | % identity | Contig and coordinates | % identity |
| <i>aadK</i>                             | 19 (192401-193189)                                                                                              | 51         | 4 (184753-185541)      | 50         | 2 (184729-185538)      | 49         |
| <i>ahpC</i>                             | 15 (78931-79491)                                                                                                | 92         | 9 (28341-28901)        | 91         | 11 (28341-28901)       | 91         |
| <i>ahpF</i>                             | 15 (77388-78914)                                                                                                | 91         | 9 (26798-28324)        | 92         | 9 (26798-28324)        | 92         |
| <i>arsC</i>                             | 18 (34769-35185)                                                                                                | 86         | 1 (430292-430708)      | 87         | 27(430334-430750)      | 87         |
| <i>bmrU</i>                             | 30 (681736-682617)                                                                                              | 60         | 1 (856664-857545)      | 60         | 35 (407266-408147)     | 60         |
| <i>cah</i>                              | 19 (37227-38174)                                                                                                | 77         | 4 (27855-28802)        | 77         | 2 (27836-28783)        | 77         |
| <i>cypA</i>                             | 12 (134522-135667)                                                                                              | 36         | 30 (159237-160382)     | 36         | 29 (147685-148830)     | 36         |
|                                         | 12 (52329-53384)                                                                                                | 36         | 30 (94118-95173)       | 37         | 29 (82470-83525)       | 37         |
|                                         | 30 (1107296-1108165)                                                                                            | 39         | 1 (488029-488904)      | 40         | 27 (488071-488946)     | 40         |

|             |                    |    |                     |    |                    |    |
|-------------|--------------------|----|---------------------|----|--------------------|----|
|             | 30 (440503-441735) | 76 | 1 (1144990-1146222) | 75 | 35 (184245-185477) | 75 |
| <i>cypX</i> | 15 (767314-768522) | 77 | 19 (156596-157807)  | 77 | 13 (287904-289115) | 77 |
| <i>katA</i> | 15 (260933-262384) | 87 | 6 (57494-58945)     | 86 | 6 (147548-148999)  | 86 |
|             | 15 (262620-264056) | 50 | 6 (55820-57268)     | 49 | 6 (145874-147322)  | 49 |
|             | 15 (191719-193188) | 44 | 6 (148884-150353)   | 44 | 8 (113029-114498)  | 44 |
| <i>katE</i> | 15 (191638-193710) | 78 | 6 (148362-150434)   | 78 | 8 (112948-115020)  | 78 |
|             | 15 (260939-262363) | 44 | 6 (57515-58939)     | 44 | 6 (147569-148993)  | 44 |
|             | 15 (262569-264086) | 40 | 6(55790-57313)      | 40 | 6 (145844-147367)  | 40 |
| <i>katX</i> | 15 (262554-264164) | 75 | 6 (55712-57295)     | 77 | 6 (145766-147349)  | 77 |
|             | 15 (260954-262375) | 51 | 6 (57503-58924)     | 51 | 6 (147557-148978)  | 51 |
|             | 15 (191722-193164) | 41 | 6 (148908-150350)   | 42 | 8 (113032-114474)  | 42 |
| <i>ksgA</i> | 2 (39413-40288)    | 85 | 14 (15494-16369)    | 85 | 4 (39332-40207)    | 85 |
| <i>mmr</i>  | 32 (435420-        | 24 | 8 (27113-           | 24 | 48 (1045-          | 24 |

|             |                          |    |                        |    |                        |    |
|-------------|--------------------------|----|------------------------|----|------------------------|----|
|             | 436676)                  |    | 28369)                 |    | 2301)                  |    |
|             | 32 (71188-<br>72429)     | 24 | 8 (376643-<br>377884)  | 24 | 48 (356242-<br>357483) | 24 |
|             | 30 (1097528-<br>1098745) | 27 | NSH <sup>2</sup>       | -  | NSH                    | -  |
|             | 30 (1101828-<br>1103033) | 23 | NSH                    | -  | NSH                    | -  |
|             | 15 (478397-<br>479275)   | 31 | NSH                    | -  | NSH                    | -  |
|             | 15 (646130-<br>647320)   | 26 | NSH                    | -  | NSH                    | -  |
|             | 15 (101682-<br>102917)   | 22 | NSH                    | -  | NSH                    | -  |
|             | 8 (151750-<br>152973)    | 24 | NSH                    | -  | NSH                    | -  |
| <i>mrpB</i> | 4 (79353-<br>79766)      | 73 | 1 (950360-<br>950773)  | 73 | 13 (77860-<br>78273)   | 73 |
| <i>mrpC</i> | 4 (79769-<br>80107)      | 81 | 1 (950019-<br>950357)  | 74 | 13 (78276-<br>78614)   | 74 |
| <i>mrpD</i> | 4 (80103-<br>81578)      | 75 | 1 (948548-<br>950023)  | 75 | 13 (78610-<br>80085)   | 76 |
| <i>mrpE</i> | 4 (81587-<br>82060)      | 68 | 1 (948066-<br>948539)  | 68 | 13 (80094-<br>80567)   | 68 |
| <i>mrpF</i> | 4 (82063-<br>82344)      | 80 | 1 (947782-<br>9480630) | 80 | 13 (80570-<br>80851)   | 80 |

|             |                          |    |                         |    |                        |    |
|-------------|--------------------------|----|-------------------------|----|------------------------|----|
| <i>mrpG</i> | <sup>1</sup> NSH         | -  | NSH                     | -  | NSH                    | -  |
| <i>msrA</i> | 30 (970057-<br>970587)   | 79 | 1 (618071-<br>618601)   | 80 | 35 (645826-<br>646356) | 80 |
| <i>nap</i>  | 5 (106919-<br>107812)    | 79 | NSH                     | -  | NSH                    | -  |
| <i>padC</i> | 4 (134172-<br>134651)    | 87 | 1 (898571-<br>899050)   | 88 | 13 (129588-<br>130067) | 88 |
| <i>penP</i> | 19 (143775-<br>144659)   | 53 | 4 (131378-<br>132262)   | 54 | 2 (131354-<br>132238)  | 54 |
| <i>pksS</i> | 12 (134531-<br>135589)   | 36 | 1 (487876-<br>488883)   | 34 | 27 (487918-<br>488925) | 34 |
|             | 12 (52284-<br>53375)     | 34 | 30 (94073-<br>95164)    | 34 | 29 (82425-<br>83516)   | 34 |
|             | 30 (440566-<br>441630)   | 45 | 1 (1145098-<br>1146159) | 44 | 35 (184308-<br>185369) | 45 |
|             | 30 (1107311-<br>1108318) | 35 | 30 (159246-<br>160289)  | 35 | 29 (147694-<br>148737) | 35 |
| <i>sodA</i> | 30 (589195-<br>589800)   | 88 | 1 (1017689-<br>1018294) | 88 | 35 (320786-<br>321391) | 88 |
| <i>sodF</i> | 30 (1014366-<br>1015196) | 68 | 1 (573598-<br>574440)   | 66 | 27 (573639-<br>574481) | 66 |
| <i>tetL</i> | NSH                      | -  | NSH                     | -  | NSH                    | -  |
| <i>thdF</i> | 15 (12788-<br>14164)     | 88 | 7 (12531-<br>13907)     | 88 | 14 (31158-<br>32534)   | 88 |
| <i>tmrB</i> | NSH                      | -  | NSH                     | -  | NSH                    | -  |

|             |                    |    |                     |    |                   |    |
|-------------|--------------------|----|---------------------|----|-------------------|----|
| <i>tpx</i>  | 30 (175068-175568) | 86 | 1 (1412005-1412505) | 86 | 15 (12969-13469)  | 86 |
| <i>yaaD</i> | 23 (4333-5214)     | 96 | 13 (14504-15385)    | 96 | 33 (14498-15379)  | 96 |
| <i>yaaJ</i> | 23 (15235-15672)   | 86 | 13 (4044-4487)      | 86 | 33 (4039-4482)    | 86 |
| <i>yaaN</i> | 2 (53377-54528)    | 69 | 14 (1251-2402)      | 70 | 4 (53299-54450)   | 70 |
| <i>ybbE</i> | 19 (218310-219614) | 62 | 4 (207338-208660)   | 62 | 2 (207339-208661) | 62 |
| <i>ybfK</i> | 5 (106934-107776)  | 60 | NSH                 | -  | NSH               | -  |
| <i>ybfO</i> | 19 (193771-194823) | 27 | NSH                 | -  | NSH               | -  |
| <i>ybxI</i> | 19 (146534-147226) | 36 | 4 (134054-134881)   | 36 | 2 (134030-134857) | 36 |
| <i>ycbJ</i> | 19 (121339-122241) | 60 | 4 (112310-113215)   | 61 | 2 (112292-113197) | 62 |
| <i>ycbR</i> | NSH                | -  | NSH                 | -  | NSH               | -  |
| <i>yceC</i> | 19 (62701-63297)   | 73 | 4 (54623-55219)     | 73 | 2 (54604-55200)   | 73 |
| <i>yceD</i> | 19 (62089-62667)   | 81 | 4 (54010-54588)     | 81 | 2 (53991-54569)   | 81 |
|             | 19 (61431-62006)   | 64 | 4 (53356-53931)     | 65 | 2 (53337-53912)   | 65 |

|             |                    |    |                    |    |                    |    |
|-------------|--------------------|----|--------------------|----|--------------------|----|
| <i>yceE</i> | 19 (61431-62006)   | 89 | 4 (53356-53931)    | 90 | 2 (53337-53912)    | 90 |
|             | 19 (62092-62667)   | 65 | 4 (54013-54588)    | 66 | 2 (53994-54569)    | 66 |
| <i>yceF</i> | 19 (60592-61362)   | 85 | 4 (52517-53287)    | 85 | 2 (52498-53268)    | 85 |
| <i>yceH</i> | 19 (56232-57317)   | 82 | 4 (48161-49246)    | 83 | 2 (48142-49227)    | 83 |
| <i>ycsF</i> | 8 (117697-118452)  | 78 | 17 (103493-104248) | 78 | 12 (103429-104184) | 78 |
| <i>ydbD</i> | 6 (15039-15851)    | 69 | 1 (326587-327399)  | 70 | 27 (326630-327442) | 70 |
|             | 15 (492211-493014) | 77 | 25 (80488-81291)   | 79 | 1 (235731-236534)  | 79 |
| <i>yddN</i> | 15 (722037-723011) | 41 | 25 (291338-292312) | 41 | 1 (24718-25692)    | 41 |
|             | 19 (70845-71822)   | 34 | 4 (62765-63742)    | 33 | 2 (62746-63723)    | 33 |
| <i>ydfB</i> | NSH                | -  | NSH                | -  | NSH                | -  |
| <i>ydhE</i> | 8 (85495-86634)    | 34 | 17 (73206-74345)   | 33 | 12 (73134-74273)   | 33 |
|             | 9 (64768-65907)    | 69 | 3 (37651-38787)    | 69 | 9 (37778-38914)    | 69 |
| <i>ydhU</i> | 6 (310-762)        | 91 | NSH                | -  | NSH                | -  |
| <i>ydjP</i> | Raw reads          |    | 1 (555747-         | 28 | 27 (555788-        | 28 |

|             |                          |    |                         |    |                        |    |
|-------------|--------------------------|----|-------------------------|----|------------------------|----|
|             | present <sup>3</sup>     |    | 556514)                 |    | 556555)                |    |
|             | NSH                      | -  | 1 (968200-<br>968955)   | 22 | NSH                    | -  |
| <i>yerP</i> | 12 (83053-<br>86262)     | 86 | 30 (124879-<br>128046)  | 87 | 29 (113232-<br>116399) | 87 |
| <i>yetM</i> | NSH                      | -  | NSH                     | -  | NSH                    | -  |
| <i>yetO</i> | 30 (404902-<br>408078)   | 63 | 1 (1169716-<br>1172892) | 62 | 35 (157555-<br>160731) | 62 |
|             | 32 (78534-<br>80165)     | 31 | 8 (368914-<br>370545)   | 31 | 48 (348513-<br>350144) | 31 |
| <i>yflM</i> | 12 (153509-<br>154501)   | 74 | 30 (174058-<br>175050)  | 73 | 29 (162506-<br>163498) | 73 |
| <i>yfnC</i> | NSH                      | -  | NSH                     | -  | NSH                    | -  |
| <i>ygaF</i> | 9 (2442-2909)            | 85 | 3 (99872-<br>100339)    | 85 | 9 (99999-<br>100466)   | 85 |
| <i>yhdA</i> | 32 (394542-<br>395045)   | 70 | 8 (68690-<br>69193)     | 71 | 48 (42633-<br>43136)   | 71 |
| <i>yhjG</i> | 31 (105768-<br>107240)   | 55 | 1 (11979-<br>13451)     | 55 | 27 (11973-<br>13445)   | 55 |
| <i>yisY</i> | 30 (1036015-<br>1036788) | 44 | 1 (555750-<br>556523)   | 44 | 27 (555791-<br>556564) | 44 |
| <i>yjiB</i> | 12 (52305-<br>53450)     | 63 | 30 (94094-<br>95239)    | 62 | 29 (82446-<br>83591)   | 62 |
|             | 30 (1107206-<br>1107206) | 44 | 1 (487855-<br>487855)   | 44 | 27 (487897-<br>487897) | 44 |

|             |                        |    |                         |    |                        |    |
|-------------|------------------------|----|-------------------------|----|------------------------|----|
|             | 1108333)               |    | 488988)                 |    | 489030)                |    |
|             | 12 (134546-<br>135652) | 33 | 30 (159261-<br>160367)  | 32 | 29 (147709-<br>148815) | 32 |
|             | 30 (440569-<br>441660) | 40 | 1 (1145068-<br>1146156) | 40 | 35 (184311-<br>185399) | 40 |
| <i>yjiC</i> | 8 (85612-<br>86670)    | 34 | 17 (73323-<br>74381)    | 33 | 12 (73251-<br>74309)   | 33 |
|             | 31 (366632-<br>367753) | 58 | 1 (270074-<br>271195)   | 57 | 27 (270139-<br>271260) | 57 |
| <i>yjqC</i> | 6 (15039-<br>15851)    | 66 | 1 (327399-<br>326587)   | 66 | 27 (326630-<br>327442) | 66 |
|             | 15 (492211-<br>493014) | 62 | 25 (80488-<br>81291)    | 65 | 1 (235731-<br>236534)  | 65 |
| <i>ykfA</i> | 35 (41187-<br>41888)   | 68 | 8 (461629-<br>462303)   | 72 | 48 (441347-<br>442021) | 72 |
| <i>ykkB</i> | NSH                    | -  | NSH                     | -  | NSH                    | -  |
| <i>ykoY</i> | 35 (5843-<br>6679)     | 76 | 8 (535267-<br>536103)   | 76 | 48 (474751-<br>475587) | 76 |
| <i>ykvJ</i> | 11 (23966-<br>24622)   | 88 | 8 (565596-<br>566252)   | 88 | 48 (505080-<br>505736) | 88 |
| <i>ykzA</i> | 35 (23947-<br>24351)   | 79 | 8 (477473-<br>477877)   | 77 | 48 (457184-<br>457588) | 77 |
|             | 35 (25019-<br>25423)   | 49 | 8 (476400-<br>476804)   | 50 | 48 (456111-<br>456515) | 50 |
| <i>ynbB</i> | 31 (425091-<br>425091) | 86 | 1 (307520-<br>307520)   | 86 | 27 (307584-<br>307584) | 86 |



|             |                          |    |                         |    |                        |    |
|-------------|--------------------------|----|-------------------------|----|------------------------|----|
|             | 426353)                  |    | 308782)                 |    | 308846)                |    |
| <i>yndN</i> | 11 (15092-<br>15505)     | 62 | 8 (556701-<br>557117)   | 62 | Raw reads<br>present   |    |
| <i>yocD</i> | 30 (1063045-<br>1064007) | 56 | 8 (461398-<br>462291)   | 31 | 48 (441116-<br>442009) | 31 |
| <i>yojK</i> | 8 (85480-<br>86676)      | 55 | 17 (73278-<br>74387)    | 57 | 12 (73206-<br>74315)   | 57 |
|             | 9 (64843-<br>65949)      | 33 | 3 (37609-<br>38715)     | 33 | 9 (37736-<br>38842)    | 33 |
| <i>yojM</i> | 30 (1002458-<br>1003000) | 58 | 1 (585797-<br>586339)   | 59 | 27 (585838-<br>586380) | 59 |
| <i>yokD</i> | NSH                      | -  | NSH                     | -  | NSH                    | -  |
| <i>yqfP</i> | 30 (577120-<br>578061)   | 90 | 1 (1029426-<br>1030367) | 90 | 35 (308713-<br>309654) | 90 |
| <i>yrhJ</i> | 30 (404902-<br>408078)   | 65 | 1 (1169716-<br>1172892) | 65 | 35 (157555-<br>160731) | 65 |
|             | 32 (78534-<br>80150)     | 23 | 8 (368929-<br>370545)   | 30 | 48 (348528-<br>350144) | 30 |
| <i>yrpB</i> | 4 (43674-<br>44708)      | 61 | 15 (40822-<br>41856)    | 61 | 13 (41906-<br>42940)   | 61 |
| <i>ytmO</i> | 15 (350732-<br>351721)   | 42 | 5 (30651-<br>31640)     | 41 | 6 (58484-<br>59473)    | 41 |
| <i>ytnJ</i> | NSH                      | -  | NSH                     | -  | NSH                    | -  |
| <i>yubB</i> | 4 (32658-<br>33449)      | 81 | 15 (29811-<br>30602)    | 81 | 13 (30893-<br>31684)   | 81 |

|             |                    |    |                    |    |                    |    |
|-------------|--------------------|----|--------------------|----|--------------------|----|
| <i>yusI</i> | 5 (34614-34964)    | 84 | 19 (48751-49101)   | 85 | 13 (180059-180409) | 85 |
| <i>yvaK</i> | 15 (744585-745322) | 87 | 25 (312932-313669) | 88 | 1 (3437-4174)      | 88 |
| <i>yvbT</i> | 15 (722019-723020) | 84 | 25 (291320-292321) | 83 | 1 (24709-25710)    | 83 |
|             | 15 (350726-351724) | 36 | 5 (30645-31643)    | 36 | 6 (58481-59479)    | 36 |
|             | 19 (70845-71825)   | 37 | 4 (62765-63745)    | 37 | 2 (62746-63726)    | 37 |
| <i>yvdP</i> | NSH                | -  | NSH                | -  | NSH                | -  |
| <i>ywcH</i> | 15 (350732-351724) | 71 | 5 (30651-31643)    | 72 | 6 (58481-59473)    | 72 |
|             | 19 (70836-71825)   | 47 | 4 (62756-63745)    | 46 | 2 (62737-63726)    | 46 |
| <i>ywnH</i> | 15 (482067-482555) | 73 | 25 (72024-72512)   | 72 | 1 (244511-244999)  | 72 |
| <i>yxeI</i> | 15 (166682-167662) | 61 | 6 (174356-175336)  | 63 | 8 (88060-89040)    | 63 |
| <i>yxeK</i> | NSH                | -  | NSH                | -  | NSH                | -  |
| <i>yyaR</i> | NSH                | -  | NSH                | -  | NSH                | -  |

386 <sup>1</sup>Homology for the proteins encoded by these genes were first searched with TBLASTN  
387 using BLOSUM62 matrix in the contigs of three target strains, and if the region of significant  
388 homology was not achieved using this matrix, BLOSUM45 matrix was used. If the protein  
389 sequences did not show homology, discontinuous megablast with corresponding gene

390 sequences as queries were used (homologous regions found in such a way are shown green).

391 <sup>2</sup>NSH means ‘no significant homology’ or few (1-6) reads was aligned with the depth of

392 coverage 1 when the raw reads from the strain were mapped with the genomic region of

393 another strain containing the gene. The contigs and coordinates of genes for which query

394 coverage was 95% or less are coloured brown. The percentage identity in black and brown

395 fonts represents amino acid identity and that in the green represents nucleotide identity. <sup>3</sup>Raw

396 reads were mapped to the genomic region of another strain.

397

398

399

400

401

402

403

404

405

406

407

408

409

410 **Table S12B: The genes involved in detoxification in *B. licheniformis* ATCC 14580 and**  
 411 **the regions of their homologs in *B. licheniformis* strains G-1, F1-1, and F2-1<sup>1</sup>**

| <i>B. licheniformis</i><br>ATCC 14580<br>Gene <sup>2</sup> | Contig, coordinates and % identity in strains of <i>B. licheniformis</i> where the homologous sequence is found |            |                        |            |                        |            |
|------------------------------------------------------------|-----------------------------------------------------------------------------------------------------------------|------------|------------------------|------------|------------------------|------------|
|                                                            | G-1                                                                                                             |            | F1-1                   |            | F2-1                   |            |
|                                                            | Contig and coordinates                                                                                          | % identity | Contig and coordinates | % identity | Contig and coordinates | % identity |
| <i>mrpG</i>                                                | 4 (82400-82702)                                                                                                 | 97         | 1 (947424-947726)      | 100        | 13 (80907-81209)       | 100        |
| <i>tetL</i>                                                | -                                                                                                               | -          | -                      | -          | -                      | -          |
| <i>tmrB</i>                                                | -                                                                                                               | -          | -                      | -          | -                      | -          |
| <i>ycbR</i>                                                | -                                                                                                               | -          | -                      | -          | -                      | -          |
| <i>ydfB</i>                                                | 30 (515811-516572)                                                                                              | 87         | 1 (1091122-1091883)    | 99         | 35 (247199-247960)     | 99         |
| <i>yetM</i>                                                | -                                                                                                               | -          | -                      | -          | -                      | -          |
| <i>yfnC</i>                                                | -                                                                                                               | -          | -                      | -          | -                      | -          |
| <i>ykkB</i>                                                | 6 (79967-80470)                                                                                                 | 95         | 1 (392250-392753)      | 100        | 27 (392259-392762)     | 100        |
| <i>yokD</i>                                                | -                                                                                                               | -          | -                      | -          | -                      | -          |
| <i>ytnJ</i>                                                | -                                                                                                               | -          | -                      | -          | -                      | -          |
| <i>yvdP</i>                                                | -                                                                                                               | -          | -                      | -          | -                      | -          |
| <i>yxeK</i>                                                | -                                                                                                               | -          | -                      | -          | -                      | -          |
| <i>yyaR</i>                                                | -                                                                                                               | -          | -                      | -          | -                      | -          |

412 <sup>1</sup>If no homologous region is found for any amino acid sequence or gene by using the

413 sequence from *B. subtilis*, the corresponding amino acid or gene sequence was obtained from

414 *B. licheniformis* ATCC 14580 (NC\_006322.1). The method of homology search and colour  
415 codes is same as that used in table S12A. These genes, when extracted from *B. subtilis*  
416 genome, showed no significant homology in table S12A. Rows with '-' in all boxes means  
417 genes were not found in *B. licheniformis* ATCC 14580 (NC\_006322.1) for further  
418 comparison with strains G-1, F1-1, and F2-1.

419

420

421

422

423

424

425

426

427

428

429

430

431

432

433

434 **Table S13: Selected genes involved in metabolism of carbohydrate and related**  
435 **molecules in *B. subtilis* 168 and the regions of their homologs in *B. licheniformis* strains**  
436 **G-1, F1-1, and F2-1**

| <i>B. subtilis</i><br>gene <sup>1</sup> | Contig, coordinates and % identity in strains of <i>B. licheniformis</i> where the homologous sequence is found |            |                        |            |                        |            |
|-----------------------------------------|-----------------------------------------------------------------------------------------------------------------|------------|------------------------|------------|------------------------|------------|
|                                         | G-1                                                                                                             |            | F1-1                   |            | F2-1                   |            |
|                                         | Contig and coordinates                                                                                          | % identity | Contig and coordinates | % identity | Contig and coordinates | % identity |
| <i>abnA</i>                             | 30 (235583-236470)                                                                                              | 68         | 1 (1352689-1353573)    | 70         | 15 (71899-72783)       | 70         |
|                                         | 32 (88427-89287)                                                                                                | 72         | 1 (364067-364927)      | 73         | 48 (343666-344526)     | 72         |
| <i>amyE</i>                             | NSH <sup>2</sup>                                                                                                | -          | NSH                    | -          | NSH                    | -          |
| <i>bglC</i>                             | 6 (78037-79578)                                                                                                 | 76         | 1 (390323-391861)      | 77         | 27 (390359-391900)     | 77         |
| <i>bglH</i>                             | 19 (30802-32217)                                                                                                | 44         | 6 (151201-152592)      | 44         | 8 (110790-112181)      | 44         |
|                                         | 30 (698770-700140)                                                                                              | 36         | 1 (839118-840488)      | 36         | 35 (424323-425693)     | 36         |
|                                         | 15 (170447-171853)                                                                                              | 87         | 6 (170166-171572)      | 87         | 8 (91825-93231)        | 87         |
|                                         | 15 (189469-190860)                                                                                              | 44         | 4 (21412-22827)        | 44         | 2 (21389-22804)        | 44         |
|                                         | NSH                                                                                                             | -          | 30 (136143-137606)     | 54         | 29 (124684-126147)     | 54         |

|             |                          |    |                           |    |                        |    |
|-------------|--------------------------|----|---------------------------|----|------------------------|----|
| <i>bglS</i> | 30 (201004-<br>201669)   | 92 | NSH                       | -  | NSH                    | -  |
| <i>csn</i>  | NSH                      | -  | NSH                       | -  | NSH                    | -  |
| <i>glgA</i> | 30 (43292-<br>44713)     | 68 | 28 (6935-<br>8386)        | 66 | 49 (8591-<br>10042)    | 67 |
| <i>lacA</i> | 1 (45576-<br>47597)      | 52 | 17 (160995-<br>163028)    | 51 | 12 (160965-<br>162998) | 51 |
|             | 15 (99036-<br>101087)    | 78 | 16 (38749-<br>40794)      | 77 | 8 (18201-<br>20246)    | 77 |
|             | 32 (9046-<br>11007)      | 24 | 8 (441599-<br>443560)     | 24 | 48 (421317-<br>423278) | 24 |
| <i>lctE</i> | 19 (52437 to<br>53390)   | 80 | 4 (43062 to<br>44015)     | 80 | 2 (43043 to<br>43996)  | 80 |
|             | 30 (204963 to<br>205889) | 35 | 1 (1383055 to<br>1383981) | 36 | 15 (41492 to<br>42418) | 36 |
| <i>yckE</i> | 19 (30802-<br>32235)     | 86 | 4 (21412-<br>22845)       | 86 | 2 (21389-<br>22822)    | 86 |
|             | 15 (189448-<br>190860)   | 49 | 6 (151201-<br>152613)     | 49 | 8 (110769-<br>112181)  | 49 |
|             | NSH                      | -  | 6 (170166-<br>171572)     | 43 | 8 (91825-<br>93231)    | 43 |
|             | 30 (698773-<br>700140)   | 38 | 1 (839118-<br>840485)     | 38 | 35 (424326-<br>42693)  | 38 |
|             | NSH                      | -  | 30 (136158-<br>137606)    | 39 | 29 (124699-<br>126147) | 39 |

|             |                    |    |                    |    |                    |    |
|-------------|--------------------|----|--------------------|----|--------------------|----|
| <i>ydaM</i> | 15 (149270-150529) | 92 | 6 (193349-194563)  | 93 | 8 (68423-69682)    | 93 |
| <i>ydhP</i> | 15 (219606-221006) | 46 | 6 (117919-119319)  | 44 | 8 (138372-139772)  | 44 |
|             | 15 (170450-171844) | 35 | 4 (21421-22845)    | 35 | 2 (21398-22822)    | 35 |
|             | 19 (30811-32235)   | 35 | 6 (170175-171569)  | 35 | 8 (91828-93222)    | 35 |
|             | 15 (189448-190851) | 37 | 6 (151210-152613)  | 37 | 8 (110769-112172)  | 37 |
|             | 30 (698764-700143) | 76 | 1 (839115-840494)  | 77 | 35 (424317-425696) | 77 |
|             | NSH                | -  | 30 (136149-137597) | 31 | 29 (124690-126138) | 31 |
| <i>yesZ</i> | 32 (9043-11010)    | 69 | 8 (441596-443557)  | 70 | 48 (421314-423275) | 70 |
|             | 1 (45585-47600)    | 26 | 17 (161004-163019) | 26 | 12 (160974-162989) | 26 |
| <i>fbp</i>  | 15 (70491-72437)   | 96 | NSH                | -  | NSH                | -  |

437 <sup>1</sup>Homology for the proteins encoded by these genes were first searched with TBLASTN  
438 using BLOSUM62 matrix in the target strains, and if the region of significant homology was  
439 not achieved using this matrix, BLOSUM45 matrix was used. If the protein sequences did not  
440 show homology, discontinuous megablast with corresponding DNA sequences as queries  
441 were used (homologous regions found in such a way are shown green). <sup>2</sup>NSH means ‘no



442 significant homology using these matrices and algorithm'. The genes for which query  
443 coverage was 95% or less are coloured brown.

444

445

446

447

448

449

450

451

452

453

454

455

456

457

458

459

460 **Table S14: Contigs, coordinates, and completeness of phage or related regions in strains**  
 461 **G-1, F2-1, and F1-1<sup>1</sup>**

| Strain | Contig | Length in Kb<br>(coordinates within<br>the contig) | G+C<br>content<br>(%) | Phage related regions                                    | Related<br>phage                     |
|--------|--------|----------------------------------------------------|-----------------------|----------------------------------------------------------|--------------------------------------|
| G-1    | 30     | 18.3 (17,702-36,073)                               | 49.16                 | Incomplete prophage                                      | <i>Bacillus</i><br>phage SP10        |
|        | 32     | 35.7 (33,580-69,333)                               | 47.23                 | Questionable prophage                                    | <i>Streptococcus</i><br>phage Cp_1   |
|        | 32     | 34 (465,547-499,568)                               | 44.34                 | Incomplete prophage                                      | <i>Bacillus</i><br>phage<br>phBC6A51 |
| F1-1   | 1      | 13 (1,291,440-<br>1,304,503)                       | 41.10                 | Questionable prophage                                    | <i>Bacillus</i><br>phage SPBc2       |
|        | 2      | 42 (1- 42, 012)                                    | 40.82                 | Questionable prophage                                    | <i>Bacillus</i><br>phage phi105      |
|        | 8      | 35.2 (380,132-<br>415,370)                         | 47.09                 | Intact phage                                             | <i>Streptococcus</i><br>phage Cp_1   |
|        | 8      | 39.9 (487,865-<br>527,841)                         | 43.31                 | Questionable phage                                       | <i>Bacillus</i><br>phage SPP1        |
|        | 24     | 0.34 (2,054- 2,394)                                | 47.8                  | <sup>2</sup> Phage terminase large<br>and small subunits | -                                    |
| F2-1   | 17     | 30.1 (541- 30,730)                                 | 41.68                 | Questionable prophage                                    | <i>Bacillus</i><br>phage phi105      |
|        | 24     | 44.1 (198- 44,396)                                 | 43.67                 | Incomplete prophage                                      | <i>Bacillus</i>                      |

|  |    |                        |       |                     |                                      |
|--|----|------------------------|-------|---------------------|--------------------------------------|
|  |    |                        |       |                     | phage SPP1                           |
|  | 48 | 35.3 (359,731-395,098) | 46.92 | Intact phage        | <i>Streptococcus</i><br>phage Cp_1   |
|  | 48 | 40 (519,448-559,496)   | 44.10 | Incomplete prophage | <i>Bacillus</i><br>phage<br>phBC6A51 |

462 <sup>1</sup>Data were obtained using the software called PHAST (Phage search tool); <sup>2</sup>found using

463 BLAST

464

465

466

467

468

469

470

471

472
